# Supplementary material
Source: PubMed Central journal article supplement (PMC33152)
Supplement: pnas_081086198_1.pdf [file pnas_081086198_1.pdf]

Supplementary material for Silverman (April 17, 2001) *Proc. Natl. Acad. Sci. USA*,  
10.1073/pnas.081086198

Profile list

| d       | Residues | H0      | H2       |
|---------|----------|---------|----------|
| 1ORC    |          |         |          |
| 3.0000  | 0.0000   | NaN     | NaN      |
| 4.0000  | 2.0000   | 1.0825  | 15.7016  |
| 5.0000  | 4.0000   | 1.0529  | 16.6387  |
| 6.0000  | 5.0000   | 1.0825  | 19.3974  |
| 7.0000  | 7.0000   | 0.9748  | 23.2170  |
| 8.0000  | 9.0000   | 0.8690  | 23.9302  |
| 9.0000  | 14.0000  | 0.4522  | 7.1038   |
| 10.0000 | 20.0000  | 0.4536  | 16.2347  |
| 11.0000 | 25.0000  | 0.4061  | 18.0842  |
| 12.0000 | 30.0000  | 0.4041  | 23.4299  |
| 13.0000 | 39.0000  | 0.2995  | 16.2629  |
| 14.0000 | 48.0000  | 0.1264  | -7.1462  |
| 15.0000 | 54.0000  | 0.0383  | -21.6778 |
| 16.0000 | 56.0000  | 0.0413  | -20.0026 |
| 17.0000 | 57.0000  | 0.0279  | -23.1104 |
| 18.0000 | 61.0000  | -0.0008 | -29.8649 |
| 19.0000 | 62.0000  | -0.0108 | -32.7292 |
| 20.0000 | 63.0000  | -0.0000 | -28.2627 |

|         |         |         |          |
|---------|---------|---------|----------|
| 1CDZ    |         |         |          |
| 3.0000  | 1.0000  | 1.3142  | 8.1673   |
| 4.0000  | 1.0000  | 1.3142  | 8.1673   |
| 5.0000  | 1.0000  | 1.3142  | 8.1673   |
| 6.0000  | 3.0000  | 1.2545  | 27.4964  |
| 7.0000  | 6.0000  | 1.1600  | 35.7832  |
| 8.0000  | 9.0000  | 1.0870  | 42.5795  |
| 9.0000  | 14.0000 | 0.9006  | 42.1265  |
| 10.0000 | 16.0000 | 0.9234  | 48.9193  |
| 11.0000 | 23.0000 | 0.9068  | 63.5354  |
| 12.0000 | 28.0000 | 0.8068  | 60.6078  |
| 13.0000 | 35.0000 | 0.5937  | 41.6510  |
| 14.0000 | 45.0000 | 0.5349  | 45.4992  |
| 15.0000 | 52.0000 | 0.4197  | 30.0590  |
| 16.0000 | 60.0000 | 0.3214  | 15.9981  |
| 17.0000 | 67.0000 | 0.2334  | 0.0655   |
| 18.0000 | 74.0000 | 0.1751  | -10.7270 |
| 19.0000 | 85.0000 | 0.0811  | -33.0303 |
| 20.0000 | 89.0000 | 0.0494  | -41.9992 |
| 21.0000 | 92.0000 | 0.0191  | -52.7253 |
| 22.0000 | 93.0000 | 0.0098  | -56.2273 |
| 23.0000 | 95.0000 | -0.0063 | -63.4127 |
| 24.0000 | 96.0000 | 0.0000  | -59.2599 |

## 1NEU

|         |          |        |          |
|---------|----------|--------|----------|
| 2.0000  | 1.0000   | 0.7812 | 0.6136   |
| 3.0000  | 1.0000   | 0.7812 | 0.6136   |
| 4.0000  | 1.0000   | 0.7812 | 0.6136   |
| 5.0000  | 1.0000   | 0.7812 | 0.6136   |
| 6.0000  | 3.0000   | 0.6879 | 14.1033  |
| 7.0000  | 5.0000   | 0.6956 | 20.2977  |
| 8.0000  | 6.0000   | 0.8086 | 28.9818  |
| 9.0000  | 10.0000  | 0.9212 | 51.0706  |
| 10.0000 | 13.0000  | 0.8610 | 53.9921  |
| 11.0000 | 16.0000  | 0.8316 | 59.5155  |
| 12.0000 | 21.0000  | 0.7467 | 59.7668  |
| 13.0000 | 29.0000  | 0.6319 | 57.6671  |
| 14.0000 | 37.0000  | 0.3936 | 26.1518  |
| 15.0000 | 46.0000  | 0.3696 | 31.9730  |
| 16.0000 | 53.0000  | 0.2788 | 18.1115  |
| 17.0000 | 59.0000  | 0.2348 | 11.9234  |
| 18.0000 | 69.0000  | 0.1579 | -2.7514  |
| 19.0000 | 76.0000  | 0.1035 | -16.1423 |
| 20.0000 | 83.0000  | 0.0940 | -14.7528 |
| 21.0000 | 90.0000  | 0.0415 | -32.7739 |
| 22.0000 | 96.0000  | 0.0037 | -47.7733 |
| 23.0000 | 106.0000 | 0.0524 | -18.1527 |
| 24.0000 | 110.0000 | 0.0354 | -25.8016 |
| 25.0000 | 112.0000 | 0.0342 | -25.8149 |
| 26.0000 | 113.0000 | 0.0264 | -30.4505 |
| 27.0000 | 113.0000 | 0.0264 | -30.4505 |
| 28.0000 | 115.0000 | 0.0000 | -50.1313 |

## 1DZO

|         |         |         |          |
|---------|---------|---------|----------|
| 5.0000  | 0.0000  | NaN     | NaN      |
| 6.0000  | 1.0000  | 1.1331  | 28.9472  |
| 7.0000  | 4.0000  | 0.8739  | 34.1661  |
| 8.0000  | 4.0000  | 0.8739  | 34.1661  |
| 9.0000  | 5.0000  | 0.9926  | 50.8342  |
| 10.0000 | 8.0000  | 0.9387  | 59.6303  |
| 11.0000 | 14.0000 | 0.8703  | 68.8770  |
| 12.0000 | 18.0000 | 0.5962  | 43.1004  |
| 13.0000 | 22.0000 | 0.6558  | 62.4348  |
| 14.0000 | 26.0000 | 0.6218  | 64.8508  |
| 15.0000 | 35.0000 | 0.4136  | 37.6017  |
| 16.0000 | 40.0000 | 0.3180  | 22.3618  |
| 17.0000 | 53.0000 | 0.2431  | 18.2312  |
| 18.0000 | 68.0000 | 0.2135  | 21.1927  |
| 19.0000 | 75.0000 | 0.2253  | 30.5339  |
| 20.0000 | 83.0000 | 0.1397  | 3.4146   |
| 21.0000 | 88.0000 | 0.1162  | -3.4059  |
| 22.0000 | 98.0000 | 0.0645  | -21.2580 |
| 23.0000 | 108.000 | 0.0182  | -39.7609 |
| 24.0000 | 109.000 | 0.0193  | -38.7396 |
| 25.0000 | 113.000 | -0.0064 | -52.4930 |
| 26.0000 | 114.000 | -0.0068 | -52.3359 |
| 27.0000 | 115.000 | -0.0010 | -47.8947 |
| 28.0000 | 119.000 | 0.0005  | -44.9828 |
| 29.0000 | 120.000 | 0.0000  | -44.9648 |

## 1A4V

|         |          |        |          |
|---------|----------|--------|----------|
| 3.0000  | 0.0000   | NaN    | NaN      |
| 4.0000  | 1.0000   | 1.2328 | 13.9285  |
| 5.0000  | 1.0000   | 1.2328 | 13.9285  |
| 6.0000  | 1.0000   | 1.2328 | 13.9285  |
| 7.0000  | 6.0000   | 0.9809 | 35.1735  |
| 8.0000  | 8.0000   | 0.8633 | 34.4167  |
| 9.0000  | 9.0000   | 0.7439 | 28.7656  |
| 10.0000 | 17.0000  | 0.5422 | 29.5989  |
| 11.0000 | 20.0000  | 0.6018 | 40.3341  |
| 12.0000 | 24.0000  | 0.5990 | 47.0748  |
| 13.0000 | 29.0000  | 0.5858 | 52.6620  |
| 14.0000 | 38.0000  | 0.6101 | 69.4178  |
| 15.0000 | 43.0000  | 0.5956 | 72.6658  |
| 16.0000 | 57.0000  | 0.4964 | 66.3991  |
| 17.0000 | 67.0000  | 0.3860 | 46.5624  |
| 18.0000 | 75.0000  | 0.3306 | 37.5282  |
| 19.0000 | 85.0000  | 0.2535 | 19.7737  |
| 20.0000 | 100.0000 | 0.1625 | -3.6533  |
| 21.0000 | 105.0000 | 0.1389 | -9.7701  |
| 22.0000 | 111.0000 | 0.0898 | -28.3827 |
| 23.0000 | 113.0000 | 0.0624 | -41.3815 |
| 24.0000 | 117.0000 | 0.0391 | -51.6050 |
| 25.0000 | 120.0000 | 0.0272 | -56.9685 |
| 26.0000 | 121.0000 | 0.0202 | -60.7326 |
| 27.0000 | 122.0000 | 0.0132 | -64.9952 |
| 28.0000 | 122.0000 | 0.0132 | -64.9952 |
| 29.0000 | 123.0000 | 0.0000 | -74.9237 |

## 1AT0

|         |          |        |          |
|---------|----------|--------|----------|
| 3.0000  | 0.0000   | NaN    | NaN      |
| 4.0000  | 2.0000   | 0.7720 | 10.9571  |
| 5.0000  | 3.0000   | 0.8374 | 14.2052  |
| 6.0000  | 4.0000   | 0.8738 | 17.8019  |
| 7.0000  | 7.0000   | 0.8998 | 25.1472  |
| 8.0000  | 9.0000   | 0.9183 | 30.7171  |
| 9.0000  | 14.0000  | 0.6514 | 24.2383  |
| 10.0000 | 17.0000  | 0.6320 | 28.6952  |
| 11.0000 | 28.0000  | 0.5875 | 40.0445  |
| 12.0000 | 31.0000  | 0.6342 | 50.9683  |
| 13.0000 | 36.0000  | 0.5461 | 43.3567  |
| 14.0000 | 47.0000  | 0.5768 | 61.5684  |
| 15.0000 | 53.0000  | 0.5231 | 57.1393  |
| 16.0000 | 67.0000  | 0.3938 | 39.5589  |
| 17.0000 | 78.0000  | 0.2971 | 22.6315  |
| 18.0000 | 87.0000  | 0.2080 | 2.9728   |
| 19.0000 | 100.0000 | 0.1570 | -5.3348  |
| 20.0000 | 113.0000 | 0.1048 | -18.1878 |
| 21.0000 | 116.0000 | 0.0834 | -25.5024 |
| 22.0000 | 120.0000 | 0.0258 | -50.1898 |
| 23.0000 | 123.0000 | 0.0115 | -56.0026 |
| 24.0000 | 124.0000 | 0.0057 | -58.6181 |
| 25.0000 | 125.0000 | 0.0000 | -61.6598 |

1PDO

|         |          |         |          |
|---------|----------|---------|----------|
| 2.5000  | 0.0000   | NaN     | NaN      |
| 3.0000  | 1.0000   | 0.9523  | 7.6925   |
| 3.5000  | 1.0000   | 0.9523  | 7.6925   |
| 4.0000  | 1.0000   | 0.9523  | 7.6925   |
| 4.5000  | 1.0000   | 0.9523  | 7.6925   |
| 5.0000  | 1.0000   | 0.9523  | 7.6925   |
| 5.5000  | 2.0000   | 1.1187  | 20.3436  |
| 6.0000  | 3.0000   | 1.1741  | 27.8759  |
| 6.5000  | 5.0000   | 1.0920  | 31.9409  |
| 7.0000  | 9.0000   | 0.9781  | 35.3164  |
| 7.5000  | 10.0000  | 0.9756  | 36.8244  |
| 8.0000  | 10.0000  | 0.9756  | 36.8244  |
| 8.5000  | 13.0000  | 0.7794  | 30.3449  |
| 9.0000  | 16.0000  | 0.7744  | 35.2445  |
| 9.5000  | 19.0000  | 0.7797  | 40.6654  |
| 10.0000 | 22.0000  | 0.7911  | 46.3940  |
| 10.5000 | 25.0000  | 0.7632  | 47.7275  |
| 11.0000 | 26.0000  | 0.7526  | 47.9613  |
| 11.5000 | 33.0000  | 0.5534  | 32.4524  |
| 12.0000 | 35.0000  | 0.5628  | 36.2230  |
| 12.5000 | 43.0000  | 0.5145  | 38.0692  |
| 13.0000 | 47.0000  | 0.5259  | 43.8659  |
| 13.5000 | 52.0000  | 0.5506  | 52.7957  |
| 14.0000 | 56.0000  | 0.5127  | 49.2746  |
| 14.5000 | 63.0000  | 0.4667  | 46.0928  |
| 15.0000 | 67.0000  | 0.3859  | 31.6766  |
| 15.5000 | 72.0000  | 0.3490  | 27.1369  |
| 16.0000 | 79.0000  | 0.3348  | 28.7252  |
| 16.5000 | 82.0000  | 0.2981  | 21.1242  |
| 17.0000 | 88.0000  | 0.2860  | 21.9618  |
| 17.5000 | 92.0000  | 0.2341  | 9.1551   |
| 18.0000 | 96.0000  | 0.1744  | -7.1789  |
| 18.5000 | 103.0000 | 0.1223  | -19.9359 |
| 19.0000 | 107.0000 | 0.1077  | -22.5078 |
| 19.5000 | 110.0000 | 0.0825  | -30.1300 |
| 20.0000 | 116.0000 | 0.0612  | -35.1955 |
| 20.5000 | 117.0000 | 0.0510  | -38.7741 |
| 21.0000 | 118.0000 | 0.0422  | -41.9970 |
| 21.5000 | 122.0000 | 0.0213  | -49.5407 |
| 22.0000 | 124.0000 | 0.0114  | -53.2436 |
| 22.5000 | 124.0000 | 0.0114  | -53.2436 |
| 23.0000 | 126.0000 | -0.0000 | -58.2538 |
| 23.5000 | 126.0000 | -0.0000 | -58.2538 |
| 24.0000 | 126.0000 | -0.0000 | -58.2538 |
| 24.5000 | 126.0000 | -0.0000 | -58.2538 |
| 25.0000 | 126.0000 | -0.0000 | -58.2538 |
| 25.5000 | 126.0000 | -0.0000 | -58.2538 |
| 26.0000 | 126.0000 | -0.0000 | -58.2538 |
| 26.5000 | 126.0000 | -0.0000 | -58.2538 |
| 27.0000 | 126.0000 | -0.0000 | -58.2538 |
| 27.5000 | 127.0000 | 0.0038  | -54.9090 |
| 28.0000 | 127.0000 | 0.0038  | -54.9090 |
| 28.5000 | 127.0000 | 0.0038  | -54.9090 |
| 29.0000 | 127.0000 | 0.0038  | -54.9090 |
| 29.5000 | 127.0000 | 0.0038  | -54.9090 |

|         |          |         |          |
|---------|----------|---------|----------|
| 30.0000 | 127.0000 | 0.0038  | -54.9090 |
| 30.5000 | 128.0000 | 0.0112  | -47.7362 |
| 31.0000 | 128.0000 | 0.0112  | -47.7362 |
| 31.5000 | 128.0000 | 0.0112  | -47.7362 |
| 32.0000 | 128.0000 | 0.0112  | -47.7362 |
| 32.5000 | 128.0000 | 0.0112  | -47.7362 |
| 33.0000 | 128.0000 | 0.0112  | -47.7362 |
| 33.5000 | 128.0000 | 0.0112  | -47.7362 |
| 34.0000 | 128.0000 | 0.0112  | -47.7362 |
| 34.5000 | 128.0000 | 0.0112  | -47.7362 |
| 35.0000 | 129.0000 | -0.0025 | -63.6195 |

2SNS

|         |          |         |          |
|---------|----------|---------|----------|
| 3.0000  | 1.0000   | 1.1921  | 2.2457   |
| 4.0000  | 2.0000   | 0.2899  | -2.1352  |
| 5.0000  | 2.0000   | 0.2899  | -2.1352  |
| 6.0000  | 4.0000   | 0.8220  | 19.1245  |
| 7.0000  | 5.0000   | 0.8991  | 24.9808  |
| 8.0000  | 10.0000  | 0.6431  | 23.0913  |
| 9.0000  | 15.0000  | 0.4364  | 16.5988  |
| 10.0000 | 21.0000  | 0.5613  | 34.2350  |
| 11.0000 | 27.0000  | 0.6060  | 44.7969  |
| 12.0000 | 37.0000  | 0.5281  | 44.7410  |
| 13.0000 | 45.0000  | 0.5714  | 58.2774  |
| 14.0000 | 52.0000  | 0.5017  | 52.2456  |
| 15.0000 | 63.0000  | 0.4009  | 40.5642  |
| 16.0000 | 71.0000  | 0.3836  | 43.1266  |
| 17.0000 | 88.0000  | 0.2582  | 20.9195  |
| 18.0000 | 95.0000  | 0.2147  | 12.3895  |
| 19.0000 | 105.0000 | 0.1632  | 0.5827   |
| 20.0000 | 112.0000 | 0.1041  | -18.3188 |
| 21.0000 | 121.0000 | 0.0725  | -27.1605 |
| 22.0000 | 128.0000 | 0.0433  | -37.6234 |
| 23.0000 | 132.0000 | 0.0370  | -38.8083 |
| 24.0000 | 135.0000 | 0.0114  | -51.6352 |
| 25.0000 | 138.0000 | -0.0024 | -59.0015 |
| 26.0000 | 139.0000 | -0.0005 | -57.2983 |
| 27.0000 | 140.0000 | 0.0002  | -56.4196 |
| 28.0000 | 141.0000 | 0.0000  | -56.1623 |

1CQ2

|         |          |        |         |
|---------|----------|--------|---------|
| 6.0000  | 0.0000   | NaN    | NaN     |
| 7.0000  | 3.0000   | 0.8451 | 36.2092 |
| 8.0000  | 4.0000   | 0.8957 | 42.6368 |
| 9.0000  | 10.0000  | 1.0195 | 63.3904 |
| 10.0000 | 13.0000  | 0.9577 | 64.5532 |
| 11.0000 | 21.0000  | 0.6176 | 42.3511 |
| 12.0000 | 29.0000  | 0.6256 | 54.7974 |
| 13.0000 | 41.0000  | 0.4283 | 37.5366 |
| 14.0000 | 54.0000  | 0.4496 | 51.0156 |
| 15.0000 | 62.0000  | 0.3847 | 42.4808 |
| 16.0000 | 78.0000  | 0.3089 | 33.6425 |
| 17.0000 | 94.0000  | 0.1422 | -3.5715 |
| 18.0000 | 109.0000 | 0.1135 | -5.7917 |

|         |          |         |          |
|---------|----------|---------|----------|
| 19.0000 | 120.0000 | 0.0430  | -26.1194 |
| 20.0000 | 130.0000 | 0.0130  | -33.8845 |
| 21.0000 | 138.0000 | 0.0122  | -31.7383 |
| 22.0000 | 144.0000 | -0.0027 | -37.1526 |
| 23.0000 | 149.0000 | -0.0084 | -38.6801 |
| 24.0000 | 152.0000 | -0.0031 | -35.2377 |
| 25.0000 | 153.0000 | -0.0000 | -33.2238 |

1PHR

|         |          |        |          |
|---------|----------|--------|----------|
| 3.0000  | 0.0000   | NaN    | NaN      |
| 4.0000  | 2.0000   | 0.9156 | 11.2321  |
| 5.0000  | 3.0000   | 0.5875 | 7.1057   |
| 6.0000  | 4.0000   | 0.6089 | 10.1670  |
| 7.0000  | 8.0000   | 0.6071 | 18.2198  |
| 8.0000  | 12.0000  | 0.6279 | 24.8507  |
| 9.0000  | 20.0000  | 0.3900 | 15.1048  |
| 10.0000 | 25.0000  | 0.4848 | 27.0611  |
| 11.0000 | 35.0000  | 0.5292 | 39.9941  |
| 12.0000 | 41.0000  | 0.5701 | 50.2080  |
| 13.0000 | 52.0000  | 0.3747 | 28.2803  |
| 14.0000 | 67.0000  | 0.4227 | 46.1528  |
| 15.0000 | 74.0000  | 0.4543 | 56.5832  |
| 16.0000 | 86.0000  | 0.3523 | 39.0312  |
| 17.0000 | 100.0000 | 0.2623 | 22.5650  |
| 18.0000 | 109.0000 | 0.2197 | 14.6152  |
| 19.0000 | 126.0000 | 0.1186 | -12.1468 |
| 20.0000 | 134.0000 | 0.1248 | -6.4676  |
| 21.0000 | 143.0000 | 0.0573 | -31.2855 |
| 22.0000 | 147.0000 | 0.0278 | -43.4793 |
| 23.0000 | 149.0000 | 0.0144 | -49.6198 |
| 24.0000 | 151.0000 | 0.0165 | -47.4616 |
| 25.0000 | 153.0000 | 0.0083 | -51.6708 |
| 26.0000 | 154.0000 | 0.0000 | -56.7342 |

1CTQ

|         |          |         |          |
|---------|----------|---------|----------|
| 4.0000  | 3.0000   | 1.0743  | 14.1077  |
| 5.0000  | 3.0000   | 1.0743  | 14.1077  |
| 6.0000  | 4.0000   | 1.0755  | 17.9696  |
| 7.0000  | 7.0000   | 0.9689  | 26.4793  |
| 8.0000  | 12.0000  | 0.7366  | 25.0527  |
| 9.0000  | 21.0000  | 0.6827  | 33.2458  |
| 10.0000 | 29.0000  | 0.6513  | 38.3078  |
| 11.0000 | 32.0000  | 0.6794  | 44.7161  |
| 12.0000 | 42.0000  | 0.6831  | 55.6988  |
| 13.0000 | 52.0000  | 0.6428  | 59.1508  |
| 14.0000 | 64.0000  | 0.5857  | 59.6113  |
| 15.0000 | 82.0000  | 0.4327  | 41.4414  |
| 16.0000 | 92.0000  | 0.3592  | 30.3198  |
| 17.0000 | 102.0000 | 0.3000  | 20.9935  |
| 18.0000 | 116.0000 | 0.2192  | 4.6353   |
| 19.0000 | 129.0000 | 0.1395  | -15.7197 |
| 20.0000 | 140.0000 | 0.0977  | -25.9815 |
| 21.0000 | 149.0000 | 0.0419  | -45.2224 |
| 22.0000 | 158.0000 | -0.0027 | -62.1765 |

|         |          |        |          |
|---------|----------|--------|----------|
| 23.0000 | 161.0000 | 0.0121 | -53.6320 |
| 24.0000 | 164.0000 | 0.0111 | -53.0244 |
| 25.0000 | 166.0000 | 0.0000 | -58.8765 |

121P

|         |          |        |          |
|---------|----------|--------|----------|
| 3.0000  | 0.0000   | NaN    | NaN      |
| 4.0000  | 2.0000   | 1.0718 | 13.3523  |
| 5.0000  | 3.0000   | 1.0743 | 14.6645  |
| 6.0000  | 4.0000   | 1.0755 | 18.8197  |
| 7.0000  | 7.0000   | 0.9689 | 26.1021  |
| 8.0000  | 13.0000  | 0.7629 | 27.9772  |
| 9.0000  | 19.0000  | 0.7894 | 39.3446  |
| 10.0000 | 29.0000  | 0.6513 | 37.9244  |
| 11.0000 | 33.0000  | 0.6915 | 46.8125  |
| 12.0000 | 42.0000  | 0.7000 | 57.8008  |
| 13.0000 | 52.0000  | 0.6174 | 54.7017  |
| 14.0000 | 65.0000  | 0.5250 | 48.9495  |
| 15.0000 | 83.0000  | 0.4320 | 42.7228  |
| 16.0000 | 93.0000  | 0.3438 | 27.9487  |
| 17.0000 | 102.0000 | 0.2811 | 16.7131  |
| 18.0000 | 115.0000 | 0.2191 | 5.2205   |
| 19.0000 | 129.0000 | 0.1445 | -12.3519 |
| 20.0000 | 140.0000 | 0.0940 | -26.2126 |
| 21.0000 | 148.0000 | 0.0330 | -48.0755 |
| 22.0000 | 156.0000 | 0.0275 | -47.3560 |
| 23.0000 | 161.0000 | 0.0121 | -52.8212 |
| 24.0000 | 164.0000 | 0.0111 | -52.2881 |
| 25.0000 | 166.0000 | 0.0000 | -58.1651 |

1DZV

|         |          |        |          |
|---------|----------|--------|----------|
| 4.0000  | 0.0000   | NaN    | NaN      |
| 5.0000  | 2.0000   | 0.7572 | 17.1393  |
| 6.0000  | 3.0000   | 0.9410 | 22.7176  |
| 7.0000  | 6.0000   | 0.8923 | 29.5224  |
| 8.0000  | 8.0000   | 0.6701 | 21.7265  |
| 9.0000  | 11.0000  | 0.4477 | 12.6496  |
| 10.0000 | 15.0000  | 0.3821 | 14.0596  |
| 11.0000 | 22.0000  | 0.4477 | 31.0350  |
| 12.0000 | 30.0000  | 0.4907 | 43.9168  |
| 13.0000 | 33.0000  | 0.5322 | 53.4825  |
| 14.0000 | 41.0000  | 0.4796 | 53.0552  |
| 15.0000 | 55.0000  | 0.3751 | 42.7292  |
| 16.0000 | 62.0000  | 0.3469 | 41.1943  |
| 17.0000 | 70.0000  | 0.2606 | 24.0691  |
| 18.0000 | 76.0000  | 0.2740 | 32.5301  |
| 19.0000 | 90.0000  | 0.2753 | 41.6257  |
| 20.0000 | 104.0000 | 0.2223 | 30.3549  |
| 21.0000 | 118.0000 | 0.2537 | 51.0755  |
| 22.0000 | 130.0000 | 0.1777 | 21.5269  |
| 23.0000 | 147.0000 | 0.1374 | 9.2194   |
| 24.0000 | 161.0000 | 0.1456 | 19.8962  |
| 25.0000 | 167.0000 | 0.1537 | 27.2426  |
| 26.0000 | 175.0000 | 0.1033 | -2.7532  |
| 27.0000 | 182.0000 | 0.0829 | -13.9870 |

|        |         |        |          |
|--------|---------|--------|----------|
| 28.000 | 188.000 | 0.0536 | -34.1042 |
| 29.000 | 193.000 | 0.0281 | -52.6377 |
| 30.000 | 200.000 | 0.0064 | -68.9123 |
| 31.000 | 201.000 | 0.0055 | -69.3200 |
| 32.000 | 203.000 | 0.0168 | -57.2339 |
| 33.000 | 205.000 | 0.0043 | -69.9551 |
| 34.000 | 206.000 | 0.0000 | -74.3732 |

1AUN

|         |          |        |          |
|---------|----------|--------|----------|
| 3.0000  | 0.0000   | NaN    | NaN      |
| 4.0000  | 1.0000   | 1.1440 | 17.3788  |
| 5.0000  | 2.0000   | 0.8960 | 14.3659  |
| 6.0000  | 4.0000   | 0.5860 | 11.6181  |
| 7.0000  | 8.0000   | 0.5240 | 16.6057  |
| 8.0000  | 13.0000  | 0.5430 | 24.9307  |
| 9.0000  | 18.0000  | 0.2110 | 6.3432   |
| 10.0000 | 23.0000  | 0.2798 | 15.0057  |
| 11.0000 | 30.0000  | 0.4135 | 32.6215  |
| 12.0000 | 39.0000  | 0.4676 | 45.3886  |
| 13.0000 | 50.0000  | 0.3464 | 32.6646  |
| 14.0000 | 61.0000  | 0.3680 | 41.6600  |
| 15.0000 | 73.0000  | 0.3274 | 39.3116  |
| 16.0000 | 91.0000  | 0.2271 | 23.2139  |
| 17.0000 | 111.0000 | 0.2119 | 25.9557  |
| 18.0000 | 119.0000 | 0.1969 | 23.8583  |
| 19.0000 | 135.0000 | 0.1288 | 5.9055   |
| 20.0000 | 149.0000 | 0.0982 | -1.9617  |
| 21.0000 | 168.0000 | 0.0919 | 0.4607   |
| 22.0000 | 178.0000 | 0.0456 | -18.5537 |
| 23.0000 | 188.0000 | 0.0372 | -20.2664 |
| 24.0000 | 194.0000 | 0.0311 | -22.5514 |
| 25.0000 | 199.0000 | 0.0097 | -34.3847 |
| 26.0000 | 201.0000 | 0.0124 | -32.1941 |
| 27.0000 | 203.0000 | 0.0190 | -27.2885 |
| 28.0000 | 205.0000 | 0.0160 | -29.0504 |
| 29.0000 | 208.0000 | 0.0000 | -41.2631 |

1LBU

|         |         |         |          |
|---------|---------|---------|----------|
| 3.0000  | 0.0000  | NaN     | NaN      |
| 4.0000  | 1.0000  | -1.7327 | -27.4721 |
| 5.0000  | 2.0000  | -0.9362 | -15.0357 |
| 6.0000  | 2.0000  | -0.9362 | -15.0357 |
| 7.0000  | 7.0000  | 0.3723  | 23.5415  |
| 8.0000  | 7.0000  | 0.3723  | 23.5415  |
| 9.0000  | 10.0000 | 0.4767  | 33.2111  |
| 10.0000 | 14.0000 | 0.5182  | 39.3967  |
| 11.0000 | 21.0000 | 0.5570  | 49.7741  |
| 12.0000 | 29.0000 | 0.5905  | 61.1019  |
| 13.0000 | 36.0000 | 0.3893  | 35.8819  |
| 14.0000 | 44.0000 | 0.3230  | 29.8203  |
| 15.0000 | 50.0000 | 0.4043  | 51.2759  |
| 16.0000 | 59.0000 | 0.3046  | 35.1265  |
| 17.0000 | 66.0000 | 0.2805  | 33.4755  |
| 18.0000 | 86.0000 | 0.1504  | 6.2391   |



|         |          |        |          |
|---------|----------|--------|----------|
| 19.0000 | 101.0000 | 0.1339 | 7.5246   |
| 20.0000 | 109.0000 | 0.0788 | -10.6978 |
| 21.0000 | 127.0000 | 0.0618 | -11.6125 |
| 22.0000 | 143.0000 | 0.0711 | -1.7534  |
| 23.0000 | 154.0000 | 0.0751 | 3.1924   |
| 24.0000 | 170.0000 | 0.0606 | -1.4494  |
| 25.0000 | 184.0000 | 0.0232 | -20.7084 |
| 26.0000 | 196.0000 | 0.0159 | -23.2188 |
| 27.0000 | 203.0000 | 0.0169 | -21.3661 |
| 28.0000 | 211.0000 | 0.0058 | -28.5687 |
| 29.0000 | 213.0000 | 0.0000 | -32.8558 |

2ACT

|         |          |         |          |
|---------|----------|---------|----------|
| 4.0000  | 2.0000   | 0.3634  | 4.7711   |
| 5.0000  | 2.0000   | 0.3634  | 4.7711   |
| 6.0000  | 4.0000   | 0.2318  | 4.2320   |
| 7.0000  | 6.0000   | 0.3574  | 11.1423  |
| 8.0000  | 10.0000  | 0.5794  | 27.5401  |
| 9.0000  | 13.0000  | 0.7502  | 44.2021  |
| 10.0000 | 16.0000  | 0.5041  | 27.2537  |
| 11.0000 | 26.0000  | 0.4779  | 34.5218  |
| 12.0000 | 34.0000  | 0.4232  | 33.8191  |
| 13.0000 | 39.0000  | 0.3890  | 32.5801  |
| 14.0000 | 49.0000  | 0.4375  | 49.7995  |
| 15.0000 | 56.0000  | 0.4652  | 60.6132  |
| 16.0000 | 71.0000  | 0.4933  | 77.6880  |
| 17.0000 | 85.0000  | 0.4271  | 68.4568  |
| 18.0000 | 100.0000 | 0.3041  | 39.2914  |
| 19.0000 | 112.0000 | 0.3002  | 45.0705  |
| 20.0000 | 127.0000 | 0.2448  | 31.9179  |
| 21.0000 | 142.0000 | 0.1869  | 15.0118  |
| 22.0000 | 163.0000 | 0.1108  | -11.7920 |
| 23.0000 | 177.0000 | 0.0651  | -29.6460 |
| 24.0000 | 193.0000 | 0.0648  | -24.4052 |
| 25.0000 | 205.0000 | 0.0323  | -40.4757 |
| 26.0000 | 212.0000 | -0.0003 | -59.4402 |
| 27.0000 | 214.0000 | 0.0067  | -53.9736 |
| 28.0000 | 218.0000 | 0.0000  | -57.8322 |

1AKZ

|         |          |        |         |
|---------|----------|--------|---------|
| 5.0000  | 1.0000   | 0.2884 | 2.6268  |
| 6.0000  | 5.0000   | 0.6077 | 16.8635 |
| 7.0000  | 7.0000   | 0.6570 | 22.2811 |
| 8.0000  | 7.0000   | 0.6570 | 22.2811 |
| 9.0000  | 13.0000  | 0.8429 | 45.1028 |
| 10.0000 | 16.0000  | 0.7793 | 44.5319 |
| 11.0000 | 24.0000  | 0.7380 | 54.4432 |
| 12.0000 | 27.0000  | 0.7501 | 60.8088 |
| 13.0000 | 40.0000  | 0.6751 | 67.5794 |
| 14.0000 | 53.0000  | 0.6456 | 75.1385 |
| 15.0000 | 63.0000  | 0.6069 | 76.7609 |
| 16.0000 | 77.0000  | 0.5743 | 81.7511 |
| 17.0000 | 89.0000  | 0.5100 | 74.2311 |
| 18.0000 | 101.0000 | 0.4877 | 77.2018 |

|         |          |        |          |
|---------|----------|--------|----------|
| 19.0000 | 114.0000 | 0.4036 | 58.9454  |
| 20.0000 | 138.0000 | 0.3286 | 47.1208  |
| 21.0000 | 156.0000 | 0.2668 | 32.1461  |
| 22.0000 | 168.0000 | 0.2116 | 12.6824  |
| 23.0000 | 184.0000 | 0.1276 | -21.5426 |
| 24.0000 | 200.0000 | 0.0638 | -49.5361 |
| 25.0000 | 208.0000 | 0.0482 | -54.9602 |
| 26.0000 | 215.0000 | 0.0291 | -64.9952 |
| 27.0000 | 218.0000 | 0.0233 | -67.8138 |
| 28.0000 | 220.0000 | 0.0160 | -72.4561 |
| 29.0000 | 221.0000 | 0.0089 | -77.6554 |
| 30.0000 | 223.0000 | 0.0000 | -84.6767 |

1BN1

|         |          |         |          |
|---------|----------|---------|----------|
| 5.0000  | 1.0000   | -0.3993 | -1.7164  |
| 6.0000  | 6.0000   | 0.5342  | 18.9241  |
| 7.0000  | 9.0000   | 0.7455  | 31.0981  |
| 8.0000  | 12.0000  | 0.5573  | 23.6442  |
| 9.0000  | 13.0000  | 0.6257  | 29.8625  |
| 10.0000 | 16.0000  | 0.5121  | 24.5223  |
| 11.0000 | 27.0000  | 0.4776  | 33.3121  |
| 12.0000 | 34.0000  | 0.4344  | 32.8532  |
| 13.0000 | 44.0000  | 0.3726  | 30.7373  |
| 14.0000 | 49.0000  | 0.4431  | 46.9603  |
| 15.0000 | 59.0000  | 0.4171  | 49.6576  |
| 16.0000 | 79.0000  | 0.4281  | 65.3568  |
| 17.0000 | 98.0000  | 0.3277  | 47.8018  |
| 18.0000 | 119.0000 | 0.3015  | 49.2707  |
| 19.0000 | 137.0000 | 0.2481  | 37.9663  |
| 20.0000 | 165.0000 | 0.1851  | 23.5341  |
| 21.0000 | 187.0000 | 0.1500  | 14.5160  |
| 22.0000 | 206.0000 | 0.1150  | 3.4001   |
| 23.0000 | 226.0000 | 0.0664  | -16.2913 |
| 24.0000 | 235.0000 | 0.0485  | -24.0690 |
| 25.0000 | 244.0000 | 0.0266  | -34.8394 |
| 26.0000 | 250.0000 | 0.0152  | -40.9144 |
| 27.0000 | 254.0000 | 0.0004  | -50.3505 |
| 28.0000 | 256.0000 | -0.0020 | -51.8314 |
| 29.0000 | 256.0000 | -0.0020 | -51.8314 |
| 30.0000 | 257.0000 | 0.0000  | -49.9101 |

2DRI

|         |         |         |          |
|---------|---------|---------|----------|
| 4.0000  | 0.0000  | NaN     | NaN      |
| 5.0000  | 1.0000  | -0.9800 | -19.2088 |
| 6.0000  | 1.0000  | -0.9800 | -19.2088 |
| 7.0000  | 2.0000  | -0.1975 | 4.0003   |
| 8.0000  | 6.0000  | 0.0177  | 3.4036   |
| 9.0000  | 10.0000 | -0.3169 | -20.9579 |
| 10.0000 | 11.0000 | -0.1821 | -10.4191 |
| 11.0000 | 16.0000 | -0.3528 | -30.7557 |
| 12.0000 | 24.0000 | -0.0832 | 0.9539   |
| 13.0000 | 30.0000 | -0.0318 | 6.1532   |
| 14.0000 | 34.0000 | 0.0151  | 13.9110  |
| 15.0000 | 37.0000 | 0.0845  | 27.6009  |

|         |          |        |          |
|---------|----------|--------|----------|
| 16.0000 | 49.0000  | 0.1277 | 36.2589  |
| 17.0000 | 58.0000  | 0.1561 | 43.1921  |
| 18.0000 | 69.0000  | 0.1960 | 55.9648  |
| 19.0000 | 84.0000  | 0.2313 | 69.7645  |
| 20.0000 | 91.0000  | 0.2243 | 69.3806  |
| 21.0000 | 108.0000 | 0.1583 | 44.3646  |
| 22.0000 | 127.0000 | 0.2094 | 71.9833  |
| 23.0000 | 143.0000 | 0.2458 | 93.8253  |
| 24.0000 | 158.0000 | 0.2435 | 97.1389  |
| 25.0000 | 170.0000 | 0.2281 | 91.3075  |
| 26.0000 | 181.0000 | 0.2440 | 104.8979 |
| 27.0000 | 196.0000 | 0.2365 | 105.1272 |
| 28.0000 | 206.0000 | 0.1971 | 78.9190  |
| 29.0000 | 214.0000 | 0.1655 | 56.3642  |
| 30.0000 | 230.0000 | 0.1002 | 5.8053   |
| 31.0000 | 243.0000 | 0.0623 | -25.1589 |
| 32.0000 | 253.0000 | 0.0355 | -48.1333 |
| 33.0000 | 260.0000 | 0.0326 | -48.8288 |
| 34.0000 | 266.0000 | 0.0221 | -58.7938 |
| 35.0000 | 268.0000 | 0.0154 | -66.0735 |
| 36.0000 | 268.0000 | 0.0154 | -66.0735 |
| 37.0000 | 271.0000 | 0.0000 | -85.3636 |

1AUA

|         |          |         |          |
|---------|----------|---------|----------|
| 3.0000  | 0.0000   | NaN     | NaN      |
| 4.0000  | 1.0000   | -0.1438 | -1.5762  |
| 5.0000  | 1.0000   | -0.1438 | -1.5762  |
| 6.0000  | 2.0000   | 0.0740  | 4.4093   |
| 7.0000  | 6.0000   | -0.1593 | -9.0923  |
| 8.0000  | 7.0000   | -0.0949 | -5.6103  |
| 9.0000  | 12.0000  | 0.0895  | 7.4852   |
| 10.0000 | 15.0000  | 0.1984  | 17.6850  |
| 11.0000 | 21.0000  | -0.0030 | -3.8074  |
| 12.0000 | 26.0000  | -0.1037 | -16.9669 |
| 13.0000 | 32.0000  | -0.0344 | -5.2368  |
| 14.0000 | 41.0000  | -0.0459 | -8.2431  |
| 15.0000 | 47.0000  | -0.0170 | -2.6362  |
| 16.0000 | 62.0000  | 0.0283  | 8.8188   |
| 17.0000 | 75.0000  | 0.0367  | 9.9347   |
| 18.0000 | 99.0000  | 0.0723  | 21.0549  |
| 19.0000 | 111.0000 | 0.1443  | 46.2983  |
| 20.0000 | 130.0000 | 0.1561  | 52.2457  |
| 21.0000 | 144.0000 | 0.1121  | 35.1519  |
| 22.0000 | 160.0000 | 0.1153  | 38.9034  |
| 23.0000 | 179.0000 | 0.1372  | 51.6916  |
| 24.0000 | 199.0000 | 0.1310  | 50.7421  |
| 25.0000 | 217.0000 | 0.1022  | 35.4392  |
| 26.0000 | 235.0000 | 0.0774  | 21.5659  |
| 27.0000 | 245.0000 | 0.0513  | 4.8431   |
| 28.0000 | 260.0000 | 0.0276  | -11.1948 |
| 29.0000 | 266.0000 | 0.0194  | -17.0446 |
| 30.0000 | 282.0000 | -0.0039 | -35.4891 |
| 31.0000 | 286.0000 | -0.0000 | -31.4490 |
| 32.0000 | 290.0000 | -0.0068 | -37.9345 |
| 33.0000 | 294.0000 | -0.0078 | -38.6023 |
| 34.0000 | 296.0000 | -0.0000 | -29.5643 |

1LDM

|         |          |         |         |
|---------|----------|---------|---------|
| 2.0000  | 0.0000   | NaN     | NaN     |
| 2.5000  | 1.0000   | -0.2686 | -1.5070 |
| 3.0000  | 1.0000   | -0.2686 | -1.5070 |
| 3.5000  | 1.0000   | -0.2686 | -1.5070 |
| 4.0000  | 1.0000   | -0.2686 | -1.5070 |
| 4.5000  | 1.0000   | -0.2686 | -1.5070 |
| 5.0000  | 1.0000   | -0.2686 | -1.5070 |
| 5.5000  | 3.0000   | 0.5777  | 17.8358 |
| 6.0000  | 4.0000   | 0.6855  | 22.0098 |
| 6.5000  | 5.0000   | 0.6288  | 20.6731 |
| 7.0000  | 5.0000   | 0.6288  | 20.6731 |
| 7.5000  | 8.0000   | 0.6935  | 28.2509 |
| 8.0000  | 9.0000   | 0.5866  | 23.2528 |
| 8.5000  | 10.0000  | 0.6288  | 28.0143 |
| 9.0000  | 10.0000  | 0.6288  | 28.0143 |
| 9.5000  | 14.0000  | 0.5675  | 30.2223 |
| 10.0000 | 15.0000  | 0.4968  | 24.9510 |
| 10.5000 | 18.0000  | 0.4668  | 26.5056 |
| 11.0000 | 20.0000  | 0.4971  | 32.7719 |
| 11.5000 | 25.0000  | 0.4794  | 36.2124 |
| 12.0000 | 28.0000  | 0.4386  | 33.7975 |
| 12.5000 | 31.0000  | 0.4016  | 31.7042 |
| 13.0000 | 34.0000  | 0.4505  | 42.6117 |
| 13.5000 | 36.0000  | 0.4544  | 45.1236 |
| 14.0000 | 40.0000  | 0.3901  | 37.1363 |
| 14.5000 | 43.0000  | 0.3824  | 38.4203 |
| 15.0000 | 49.0000  | 0.4200  | 52.3555 |
| 15.5000 | 54.0000  | 0.4308  | 58.9303 |
| 16.0000 | 58.0000  | 0.3966  | 53.5508 |
| 16.5000 | 64.0000  | 0.3504  | 46.3914 |
| 17.0000 | 71.0000  | 0.3755  | 58.5884 |
| 17.5000 | 75.0000  | 0.3917  | 66.1794 |
| 18.0000 | 84.0000  | 0.4137  | 79.3363 |
| 18.5000 | 93.0000  | 0.3954  | 78.9369 |
| 19.0000 | 97.0000  | 0.3965  | 81.6810 |
| 19.5000 | 102.0000 | 0.3756  | 77.0536 |
| 20.0000 | 111.0000 | 0.3627  | 77.3594 |
| 20.5000 | 121.0000 | 0.3492  | 77.5045 |
| 21.0000 | 124.0000 | 0.3390  | 74.9194 |
| 21.5000 | 128.0000 | 0.3342  | 75.1569 |
| 22.0000 | 137.0000 | 0.3235  | 75.6084 |
| 22.5000 | 145.0000 | 0.3308  | 83.8281 |
| 23.0000 | 150.0000 | 0.3267  | 84.5886 |
| 23.5000 | 161.0000 | 0.2968  | 74.8403 |
| 24.0000 | 170.0000 | 0.2941  | 78.1966 |
| 24.5000 | 182.0000 | 0.2837  | 78.5393 |
| 25.0000 | 190.0000 | 0.2702  | 74.2549 |
| 25.5000 | 192.0000 | 0.2794  | 81.0540 |
| 26.0000 | 200.0000 | 0.2798  | 85.5488 |
| 26.5000 | 210.000  | 0.2564  | 74.5024 |
| 27.0000 | 219.000  | 0.2355  | 64.1700 |
| 27.5000 | 225.000  | 0.2163  | 52.8587 |
| 28.0000 | 233.000  | 0.1882  | 34.9560 |
| 28.5000 | 239.000  | 0.1565  | 12.6167 |
| 29.0000 | 245.000  | 0.1481  | 8.4659  |

|         |         |         |           |
|---------|---------|---------|-----------|
| 29.5000 | 253.000 | 0.1160  | -15.3567  |
| 30.0000 | 259.000 | 0.1015  | -25.6117  |
| 30.5000 | 269.000 | 0.0773  | -43.6017  |
| 31.0000 | 275.000 | 0.0595  | -57.9398  |
| 31.5000 | 279.000 | 0.0500  | -65.5183  |
| 32.0000 | 284.000 | 0.0299  | -83.8745  |
| 32.5000 | 286.000 | 0.0296  | -83.2899  |
| 33.0000 | 292.000 | 0.0254  | -85.4416  |
| 33.5000 | 292.000 | 0.0254  | -85.4416  |
| 34.0000 | 296.000 | 0.0167  | -93.6586  |
| 34.5000 | 297.000 | 0.0205  | -88.9297  |
| 35.0000 | 299.000 | 0.0116  | -98.8478  |
| 35.5000 | 302.000 | 0.0062  | -104.4596 |
| 36.0000 | 306.000 | -0.0023 | -113.7621 |
| 36.5000 | 308.000 | 0.0023  | -107.1272 |
| 37.0000 | 311.000 | 0.0001  | -108.9505 |
| 37.5000 | 311.000 | 0.0001  | -108.9505 |
| 38.0000 | 312.000 | 0.0043  | -102.5701 |
| 38.5000 | 313.000 | -0.0009 | -109.7272 |
| 39.0000 | 315.000 | -0.0008 | -108.9303 |
| 39.5000 | 315.000 | -0.0008 | -108.9303 |
| 40.0000 | 315.000 | -0.0008 | -108.9303 |
| 40.5000 | 315.000 | -0.0008 | -108.9303 |
| 41.0000 | 315.000 | -0.0008 | -108.9303 |
| 41.5000 | 316.000 | -0.0059 | -117.2798 |
| 42.0000 | 316.000 | -0.0059 | -117.2798 |
| 42.5000 | 317.000 | -0.0067 | -118.4064 |
| 43.0000 | 317.000 | -0.0067 | -118.4064 |
| 43.5000 | 318.000 | -0.0025 | -110.3375 |
| 44.0000 | 318.000 | -0.0025 | -110.3375 |
| 44.5000 | 318.000 | -0.0025 | -110.3375 |
| 45.0000 | 319.000 | -0.0041 | -113.1046 |
| 45.5000 | 319.000 | -0.0041 | -113.1046 |
| 46.0000 | 319.000 | -0.0041 | -113.1046 |
| 46.5000 | 319.000 | -0.0041 | -113.1046 |
| 47.0000 | 321.000 | 0.0021  | -98.7865  |
| 47.5000 | 323.000 | -0.0014 | -106.0990 |
| 48.0000 | 326.000 | 0.0024  | -96.3301  |
| 48.5000 | 326.000 | 0.0024  | -96.3301  |
| 49.0000 | 326.000 | 0.0024  | -96.3301  |
| 49.5000 | 326.000 | 0.0024  | -96.3301  |
| 50.0000 | 326.000 | 0.0024  | -96.3301  |
| 50.5000 | 326.000 | 0.0024  | -96.3301  |
| 51.0000 | 326.000 | 0.0024  | -96.3301  |
| 51.5000 | 327.000 | 0.0041  | -91.6196  |
| 52.0000 | 327.000 | 0.0041  | -91.6196  |
| 52.5000 | 328.000 | -0.0008 | -104.7498 |
| 53.0000 | 328.000 | -0.0008 | -104.7498 |
| 53.5000 | 329.000 | 0.0008  | -99.6953  |

1FSZ

|        |        |        |        |
|--------|--------|--------|--------|
| 1.0000 | 1.0000 | 0.9625 | 0.6969 |
| 1.5000 | 1.0000 | 0.9625 | 0.6969 |
| 2.0000 | 1.0000 | 0.9625 | 0.6969 |
| 2.5000 | 1.0000 | 0.9625 | 0.6969 |

|         |          |        |          |
|---------|----------|--------|----------|
| 3.0000  | 1.0000   | 0.9625 | 0.6969   |
| 3.5000  | 1.0000   | 0.9625 | 0.6969   |
| 4.0000  | 1.0000   | 0.9625 | 0.6969   |
| 4.5000  | 1.0000   | 0.9625 | 0.6969   |
| 5.0000  | 1.0000   | 0.9625 | 0.6969   |
| 5.5000  | 4.0000   | 0.8494 | 17.3111  |
| 6.0000  | 4.0000   | 0.8494 | 17.3111  |
| 6.5000  | 7.0000   | 0.7508 | 20.0704  |
| 7.0000  | 7.0000   | 0.7508 | 20.0704  |
| 7.5000  | 9.0000   | 0.7476 | 24.4394  |
| 8.0000  | 10.0000  | 0.7691 | 27.7652  |
| 8.5000  | 13.0000  | 0.8353 | 38.0122  |
| 9.0000  | 15.0000  | 0.8918 | 45.8626  |
| 9.5000  | 17.0000  | 0.8992 | 50.1966  |
| 10.0000 | 20.0000  | 0.8401 | 49.9657  |
| 10.5000 | 25.0000  | 0.6879 | 41.7026  |
| 11.0000 | 26.0000  | 0.6979 | 44.3533  |
| 11.5000 | 31.0000  | 0.6923 | 50.7155  |
| 12.0000 | 37.0000  | 0.6981 | 58.6391  |
| 12.5000 | 45.0000  | 0.6890 | 65.5486  |
| 13.0000 | 50.0000  | 0.7073 | 73.1195  |
| 13.5000 | 56.0000  | 0.7034 | 77.9435  |
| 14.0000 | 61.0000  | 0.6413 | 70.6848  |
| 14.5000 | 69.0000  | 0.5768 | 64.4712  |
| 15.0000 | 74.0000  | 0.5733 | 67.9359  |
| 15.5000 | 81.0000  | 0.5482 | 67.7924  |
| 16.0000 | 87.0000  | 0.5592 | 75.3155  |
| 16.5000 | 97.0000  | 0.5117 | 70.2846  |
| 17.0000 | 103.0000 | 0.4884 | 68.0073  |
| 17.5000 | 116.0000 | 0.4735 | 72.1266  |
| 18.0000 | 124.0000 | 0.4265 | 62.3800  |
| 18.5000 | 131.0000 | 0.4036 | 59.1249  |
| 19.0000 | 141.0000 | 0.3727 | 54.3433  |
| 19.5000 | 155.0000 | 0.3421 | 50.4893  |
| 20.0000 | 170.0000 | 0.3316 | 53.5820  |
| 20.5000 | 177.0000 | 0.3413 | 60.7746  |
| 21.0000 | 185.0000 | 0.3208 | 55.4898  |
| 21.5000 | 193.0000 | 0.3007 | 50.3422  |
| 22.0000 | 204.0000 | 0.2535 | 33.2102  |
| 22.5000 | 211.0000 | 0.2538 | 36.3598  |
| 23.0000 | 222.0000 | 0.2171 | 22.2652  |
| 23.5000 | 229.0000 | 0.1957 | 13.6258  |
| 24.0000 | 238.0000 | 0.1702 | 2.9755   |
| 24.5000 | 248.0000 | 0.1508 | -4.3108  |
| 25.0000 | 255.0000 | 0.1446 | -5.4171  |
| 25.5000 | 265.0000 | 0.1281 | -12.2656 |
| 26.0000 | 272.0000 | 0.1114 | -20.8634 |
| 26.5000 | 279.0000 | 0.0927 | -31.2470 |
| 27.0000 | 289.0000 | 0.0743 | -41.0670 |
| 27.5000 | 296.0000 | 0.0534 | -54.4151 |
| 28.0000 | 299.0000 | 0.0537 | -53.1612 |
| 28.5000 | 301.0000 | 0.0427 | -61.2654 |
| 29.0000 | 304.0000 | 0.0311 | -69.9832 |
| 29.5000 | 308.0000 | 0.0270 | -72.1684 |
| 30.0000 | 311.0000 | 0.0213 | -76.3109 |
| 30.5000 | 316.0000 | 0.0126 | -82.6156 |

|         |          |         |           |
|---------|----------|---------|-----------|
| 31.0000 | 318.0000 | 0.0025  | -91.6091  |
| 31.5000 | 319.0000 | 0.0054  | -88.3958  |
| 32.0000 | 320.0000 | 0.0028  | -90.8013  |
| 32.5000 | 321.0000 | 0.0000  | -93.3279  |
| 33.0000 | 321.0000 | 0.0000  | -93.3279  |
| 33.5000 | 322.0000 | -0.0081 | -102.0580 |
| 34.0000 | 322.0000 | -0.0081 | -102.0580 |
| 34.5000 | 326.0000 | -0.0156 | -109.5865 |
| 35.0000 | 326.0000 | -0.0156 | -109.5865 |
| 35.5000 | 327.0000 | -0.0181 | -112.4915 |
| 36.0000 | 327.0000 | -0.0181 | -112.4915 |
| 36.5000 | 327.0000 | -0.0181 | -112.4915 |
| 37.0000 | 327.0000 | -0.0181 | -112.4915 |
| 37.5000 | 328.0000 | -0.0152 | -108.1263 |
| 38.0000 | 328.0000 | -0.0152 | -108.1263 |
| 38.5000 | 328.0000 | -0.0152 | -108.1263 |
| 39.0000 | 328.0000 | -0.0152 | -108.1263 |
| 39.5000 | 328.0000 | -0.0152 | -108.1263 |
| 40.0000 | 329.0000 | -0.0122 | -103.2085 |
| 40.5000 | 329.0000 | -0.0122 | -103.2085 |
| 41.0000 | 331.0000 | -0.0195 | -114.8602 |
| 41.5000 | 331.0000 | -0.0195 | -114.8602 |
| 42.0000 | 331.0000 | -0.0195 | -114.8602 |
| 42.5000 | 331.0000 | -0.0195 | -114.8602 |
| 43.0000 | 331.0000 | -0.0195 | -114.8602 |
| 43.5000 | 331.0000 | -0.0195 | -114.8602 |
| 44.0000 | 333.0000 | -0.0224 | -119.8655 |
| 44.5000 | 333.0000 | -0.0224 | -119.8655 |
| 45.0000 | 334.0000 | -0.0232 | -121.2165 |

1UBY

|         |          |         |          |
|---------|----------|---------|----------|
| 3.0000  | 0.0000   | NaN     | NaN      |
| 4.0000  | 2.0000   | -1.2629 | -18.2034 |
| 5.0000  | 3.0000   | -0.7502 | -10.4159 |
| 6.0000  | 4.0000   | -0.7589 | -13.2223 |
| 7.0000  | 5.0000   | -0.6118 | -10.7549 |
| 8.0000  | 5.0000   | -0.6118 | -10.7549 |
| 9.0000  | 7.0000   | -0.3584 | -1.1506  |
| 10.0000 | 13.0000  | 0.0122  | 16.1849  |
| 11.0000 | 19.0000  | 0.0355  | 14.9994  |
| 12.0000 | 23.0000  | 0.0882  | 20.3794  |
| 13.0000 | 27.0000  | -0.0218 | 0.8404   |
| 14.0000 | 32.0000  | -0.0892 | -11.4323 |
| 15.0000 | 45.0000  | 0.1027  | 26.0817  |
| 16.0000 | 57.0000  | 0.1744  | 43.0364  |
| 17.0000 | 69.0000  | 0.1560  | 38.6878  |
| 18.0000 | 78.0000  | 0.1931  | 50.6340  |
| 19.0000 | 95.0000  | 0.1718  | 45.8109  |
| 20.0000 | 110.0000 | 0.2276  | 69.6042  |
| 21.0000 | 128.0000 | 0.2043  | 63.8919  |
| 22.0000 | 149.0000 | 0.2753  | 101.2995 |
| 23.0000 | 167.0000 | 0.2674  | 101.0430 |
| 24.0000 | 185.0000 | 0.2579  | 100.5321 |
| 25.0000 | 200.0000 | 0.2397  | 93.5570  |
| 26.0000 | 222.0000 | 0.2243  | 90.0042  |

|         |          |         |          |
|---------|----------|---------|----------|
| 27.0000 | 238.0000 | 0.2076  | 82.5456  |
| 28.0000 | 257.0000 | 0.1461  | 41.9790  |
| 29.0000 | 268.0000 | 0.1237  | 26.6564  |
| 30.0000 | 288.0000 | 0.0661  | -17.7654 |
| 31.0000 | 300.0000 | 0.0520  | -27.6568 |
| 32.0000 | 315.0000 | 0.0203  | -55.5867 |
| 33.0000 | 322.0000 | 0.0184  | -55.9699 |
| 34.0000 | 331.0000 | 0.0044  | -69.7702 |
| 35.0000 | 335.0000 | 0.0047  | -68.4185 |
| 36.0000 | 340.0000 | 0.0038  | -68.5125 |
| 37.0000 | 341.0000 | 0.0052  | -66.4643 |
| 38.0000 | 344.0000 | 0.0050  | -66.0592 |
| 39.0000 | 346.0000 | 0.0016  | -70.7496 |
| 40.0000 | 346.0000 | 0.0016  | -70.7496 |
| 41.0000 | 346.0000 | 0.0016  | -70.7496 |
| 42.0000 | 347.0000 | -0.0004 | -73.9294 |
| 43.0000 | 348.0000 | 0.0000  | -73.0029 |

1A26

|         |          |         |          |
|---------|----------|---------|----------|
| 4.0000  | 2.0000   | -0.2968 | -3.7634  |
| 5.0000  | 2.0000   | -0.2968 | -3.7634  |
| 6.0000  | 3.0000   | -0.0381 | 2.2416   |
| 7.0000  | 5.0000   | 0.0960  | 7.2532   |
| 8.0000  | 7.0000   | 0.3730  | 22.2502  |
| 9.0000  | 12.0000  | 0.1810  | 9.8124   |
| 10.0000 | 15.0000  | 0.2555  | 18.9587  |
| 11.0000 | 20.0000  | 0.1166  | 5.0039   |
| 12.0000 | 25.0000  | 0.1740  | 14.6070  |
| 13.0000 | 36.0000  | 0.2154  | 24.7393  |
| 14.0000 | 47.0000  | 0.3149  | 46.1566  |
| 15.0000 | 57.0000  | 0.4485  | 77.9035  |
| 16.0000 | 69.0000  | 0.4378  | 79.7745  |
| 17.0000 | 84.0000  | 0.4035  | 77.5245  |
| 18.0000 | 99.0000  | 0.3609  | 71.5393  |
| 19.0000 | 120.0000 | 0.3702  | 84.3742  |
| 20.0000 | 137.0000 | 0.2959  | 63.1677  |
| 21.0000 | 156.0000 | 0.2812  | 64.2633  |
| 22.0000 | 172.0000 | 0.2702  | 64.9875  |
| 23.0000 | 192.0000 | 0.2779  | 76.1949  |
| 24.0000 | 216.0000 | 0.2374  | 61.6499  |
| 25.0000 | 241.0000 | 0.1877  | 39.4352  |
| 26.0000 | 257.0000 | 0.1524  | 21.8725  |
| 27.0000 | 272.0000 | 0.1443  | 20.6645  |
| 28.0000 | 287.0000 | 0.1165  | 4.0837   |
| 29.0000 | 300.0000 | 0.0769  | -23.6867 |
| 30.0000 | 313.0000 | 0.0565  | -37.4330 |
| 31.0000 | 322.0000 | 0.0449  | -45.7103 |
| 32.0000 | 330.0000 | 0.0332  | -55.0313 |
| 33.0000 | 332.0000 | 0.0277  | -60.3500 |
| 34.0000 | 340.0000 | 0.0128  | -74.8757 |
| 35.0000 | 342.0000 | 0.0104  | -77.2566 |
| 36.0000 | 345.0000 | 0.0010  | -88.2859 |
| 37.0000 | 346.0000 | 0.0029  | -85.5303 |
| 38.0000 | 348.0000 | 0.0018  | -86.5202 |
| 39.0000 | 350.0000 | 0.0026  | -84.8313 |



|         |          |        |          |
|---------|----------|--------|----------|
| 40.0000 | 350.0000 | 0.0026 | -84.8313 |
| 41.0000 | 351.0000 | 0.0000 | -88.8202 |

1PHC

|         |          |        |          |
|---------|----------|--------|----------|
| 4.0000  | 2.0000   | 0.4731 | 6.1863   |
| 5.0000  | 4.0000   | 0.7433 | 14.2272  |
| 6.0000  | 4.0000   | 0.7433 | 14.2272  |
| 7.0000  | 4.0000   | 0.7433 | 14.2272  |
| 8.0000  | 5.0000   | 0.6832 | 16.3673  |
| 9.0000  | 10.0000  | 0.3041 | 6.0551   |
| 10.0000 | 19.0000  | 0.2279 | 9.5751   |
| 11.0000 | 26.0000  | 0.3888 | 31.1809  |
| 12.0000 | 33.0000  | 0.3836 | 35.0422  |
| 13.0000 | 40.0000  | 0.3189 | 28.7533  |
| 14.0000 | 51.0000  | 0.3477 | 40.5449  |
| 15.0000 | 64.0000  | 0.3113 | 39.1952  |
| 16.0000 | 77.0000  | 0.2704 | 35.6162  |
| 17.0000 | 94.0000  | 0.3275 | 57.1817  |
| 18.0000 | 107.0000 | 0.2850 | 49.1693  |
| 19.0000 | 125.0000 | 0.2596 | 47.5613  |
| 20.0000 | 148.0000 | 0.3047 | 72.4775  |
| 21.0000 | 167.0000 | 0.2710 | 64.9070  |
| 22.0000 | 191.0000 | 0.2406 | 57.8713  |
| 23.0000 | 208.0000 | 0.2487 | 67.2838  |
| 24.0000 | 236.0000 | 0.2166 | 58.1299  |
| 25.0000 | 258.0000 | 0.2025 | 55.8898  |
| 26.0000 | 288.0000 | 0.1538 | 32.0931  |
| 27.0000 | 303.0000 | 0.1179 | 10.4798  |
| 28.0000 | 315.0000 | 0.1034 | 2.3999   |
| 29.0000 | 335.0000 | 0.0914 | -2.6187  |
| 30.0000 | 355.0000 | 0.0748 | -12.5894 |
| 31.0000 | 367.0000 | 0.0559 | -27.5893 |
| 32.0000 | 377.0000 | 0.0310 | -50.1578 |
| 33.0000 | 384.0000 | 0.0266 | -53.4132 |
| 34.0000 | 394.0000 | 0.0152 | -63.9198 |
| 35.0000 | 398.0000 | 0.0072 | -72.5057 |
| 36.0000 | 402.0000 | 0.0025 | -77.4438 |
| 37.0000 | 403.0000 | 0.0007 | -79.7376 |
| 38.0000 | 405.0000 | 0.0000 | -80.2578 |

1BGV

|         |         |         |          |
|---------|---------|---------|----------|
| 4.0000  | 1.0000  | -0.8682 | -9.7210  |
| 5.0000  | 3.0000  | -1.1154 | -23.2073 |
| 6.0000  | 3.0000  | -1.1154 | -23.2073 |
| 7.0000  | 5.0000  | -0.9101 | -24.8084 |
| 8.0000  | 8.0000  | -0.6384 | -18.5879 |
| 9.0000  | 15.0000 | -0.1468 | 4.5444   |
| 10.0000 | 21.0000 | -0.1509 | -0.9509  |
| 11.0000 | 30.0000 | -0.0527 | 5.3632   |
| 12.0000 | 35.0000 | -0.1402 | -7.3092  |
| 13.0000 | 49.0000 | -0.0135 | 8.3886   |
| 14.0000 | 64.0000 | 0.0785  | 23.1793  |
| 15.0000 | 81.0000 | 0.1237  | 31.0606  |
| 16.0000 | 97.0000 | 0.1835  | 45.7901  |

|         |          |        |          |
|---------|----------|--------|----------|
| 17.0000 | 109.0000 | 0.1818 | 46.1962  |
| 18.0000 | 126.0000 | 0.2341 | 63.4851  |
| 19.0000 | 151.0000 | 0.2318 | 65.2751  |
| 20.0000 | 177.0000 | 0.2559 | 77.8054  |
| 21.0000 | 198.0000 | 0.2393 | 74.0659  |
| 22.0000 | 225.0000 | 0.2206 | 69.7999  |
| 23.0000 | 256.0000 | 0.2236 | 76.0899  |
| 24.0000 | 274.0000 | 0.2067 | 70.0613  |
| 25.0000 | 302.0000 | 0.1886 | 63.7336  |
| 26.0000 | 324.0000 | 0.1732 | 57.6568  |
| 27.0000 | 344.0000 | 0.1363 | 35.0307  |
| 28.0000 | 358.0000 | 0.1079 | 16.1565  |
| 29.0000 | 388.0000 | 0.0848 | 3.1344   |
| 30.0000 | 409.0000 | 0.0670 | -8.7854  |
| 31.0000 | 418.0000 | 0.0572 | -16.2593 |
| 32.0000 | 429.0000 | 0.0453 | -26.2399 |
| 33.0000 | 437.0000 | 0.0184 | -52.9324 |
| 34.0000 | 442.0000 | 0.0097 | -61.6949 |
| 35.0000 | 442.0000 | 0.0097 | -61.6949 |
| 36.0000 | 445.0000 | 0.0082 | -63.0217 |
| 37.0000 | 447.0000 | 0.0010 | -72.2575 |
| 38.0000 | 449.0000 | 0.0000 | -73.3189 |

1GAI

|         |          |         |          |
|---------|----------|---------|----------|
| 4.0000  | 0.0000   | NaN     | NaN      |
| 5.0000  | 1.0000   | -0.5862 | -12.3482 |
| 6.0000  | 2.0000   | 0.2599  | 12.0898  |
| 7.0000  | 4.0000   | 0.7740  | 33.9263  |
| 8.0000  | 5.0000   | 0.7057  | 31.7626  |
| 9.0000  | 9.0000   | 0.5056  | 25.0602  |
| 10.0000 | 16.0000  | 0.3043  | 16.4272  |
| 11.0000 | 21.0000  | 0.2049  | 10.0849  |
| 12.0000 | 39.0000  | 0.0852  | 2.8271   |
| 13.0000 | 46.0000  | 0.0717  | 1.3199   |
| 14.0000 | 53.0000  | 0.0788  | 4.4742   |
| 15.0000 | 66.0000  | 0.0970  | 10.6047  |
| 16.0000 | 80.0000  | 0.0027  | -11.2596 |
| 17.0000 | 94.0000  | 0.0284  | -2.8993  |
| 18.0000 | 111.0000 | 0.0391  | 1.8651   |
| 19.0000 | 132.0000 | 0.1105  | 27.9461  |
| 20.0000 | 150.0000 | 0.1008  | 25.4256  |
| 21.0000 | 182.0000 | 0.0942  | 25.7800  |
| 22.0000 | 214.0000 | 0.0763  | 20.6460  |
| 23.0000 | 243.0000 | 0.0596  | 14.1906  |
| 24.0000 | 265.0000 | 0.0663  | 19.3538  |
| 25.0000 | 295.0000 | 0.0424  | 6.9779   |
| 26.0000 | 323.0000 | 0.0319  | 2.0534   |
| 27.0000 | 359.0000 | 0.0199  | -4.4545  |
| 28.0000 | 391.0000 | 0.0202  | -2.5213  |
| 29.0000 | 408.0000 | 0.0102  | -9.8148  |
| 30.0000 | 425.0000 | 0.0003  | -17.7457 |
| 31.0000 | 441.0000 | -0.0067 | -23.6152 |
| 32.0000 | 450.0000 | -0.0028 | -19.4895 |
| 33.0000 | 461.0000 | 0.0003  | -15.7960 |
| 34.0000 | 468.0000 | 0.0012  | -14.5788 |

|         |          |        |          |
|---------|----------|--------|----------|
| 35.0000 | 469.0000 | 0.0021 | -13.4754 |
| 36.0000 | 470.0000 | 0.0014 | -14.3569 |
| 37.0000 | 472.0000 | 0.0000 | -16.1200 |

3COX

|         |          |         |          |
|---------|----------|---------|----------|
| 5.0000  | 0.0000   | NaN     | NaN      |
| 6.0000  | 1.0000   | 0.4358  | 13.3929  |
| 7.0000  | 1.0000   | 0.4358  | 13.3929  |
| 8.0000  | 4.0000   | -0.1756 | -11.3382 |
| 9.0000  | 9.0000   | 0.0155  | 3.1773   |
| 10.0000 | 16.0000  | 0.1912  | 18.9183  |
| 11.0000 | 20.0000  | 0.1179  | 11.3313  |
| 12.0000 | 26.0000  | 0.1668  | 19.2856  |
| 13.0000 | 35.0000  | 0.1978  | 25.0958  |
| 14.0000 | 43.0000  | 0.2458  | 35.6288  |
| 15.0000 | 52.0000  | 0.1953  | 27.7857  |
| 16.0000 | 66.0000  | 0.2962  | 56.6119  |
| 17.0000 | 80.0000  | 0.3343  | 70.0558  |
| 18.0000 | 100.0000 | 0.3181  | 71.9148  |
| 19.0000 | 119.0000 | 0.3060  | 73.9474  |
| 20.0000 | 135.0000 | 0.3113  | 81.3535  |
| 21.0000 | 154.0000 | 0.2729  | 70.4102  |
| 22.0000 | 170.0000 | 0.2744  | 76.9220  |
| 23.0000 | 192.0000 | 0.2938  | 94.2071  |
| 24.0000 | 221.0000 | 0.2149  | 59.0122  |
| 25.0000 | 251.0000 | 0.2140  | 66.8793  |
| 26.0000 | 281.0000 | 0.2109  | 72.3614  |
| 27.0000 | 307.0000 | 0.1651  | 46.8375  |
| 28.0000 | 334.0000 | 0.1180  | 17.4654  |
| 29.0000 | 367.0000 | 0.1019  | 11.9353  |
| 30.0000 | 395.0000 | 0.0687  | -11.2621 |
| 31.0000 | 428.0000 | 0.0365  | -34.9393 |
| 32.0000 | 453.0000 | 0.0155  | -51.9385 |
| 33.0000 | 468.0000 | 0.0083  | -57.3582 |
| 34.0000 | 482.0000 | 0.0031  | -61.0544 |
| 35.0000 | 488.0000 | 0.0004  | -63.5552 |
| 36.0000 | 494.0000 | -0.0014 | -65.0197 |
| 37.0000 | 497.0000 | 0.0002  | -62.6490 |
| 38.0000 | 500.0000 | 0.0000  | -62.4751 |

1FEH

|         |         |        |         |
|---------|---------|--------|---------|
| 4.0000  | 1.0000  | 0.5024 | 0.2704  |
| 5.0000  | 2.0000  | 0.5024 | 5.0892  |
| 6.0000  | 3.0000  | 0.4397 | 7.1381  |
| 7.0000  | 8.0000  | 0.4985 | 17.0229 |
| 8.0000  | 11.0000 | 0.1434 | 0.6676  |
| 9.0000  | 11.0000 | 0.1434 | 0.6676  |
| 10.0000 | 14.0000 | 0.1733 | 6.0362  |
| 11.0000 | 20.0000 | 0.1819 | 11.6786 |
| 12.0000 | 29.0000 | 0.0598 | 0.0730  |
| 13.0000 | 38.0000 | 0.0582 | 1.7624  |
| 14.0000 | 43.0000 | 0.1019 | 11.5568 |
| 15.0000 | 52.0000 | 0.1010 | 12.8388 |
| 16.0000 | 63.0000 | 0.1352 | 22.5301 |

|         |          |         |          |
|---------|----------|---------|----------|
| 17.0000 | 77.0000  | 0.1141  | 18.4488  |
| 18.0000 | 89.0000  | 0.1309  | 25.9411  |
| 19.0000 | 103.0000 | 0.1172  | 24.0556  |
| 20.0000 | 112.0000 | 0.1655  | 44.0518  |
| 21.0000 | 130.0000 | 0.1863  | 56.4175  |
| 22.0000 | 150.0000 | 0.1819  | 58.1841  |
| 23.0000 | 169.0000 | 0.2128  | 77.2057  |
| 24.0000 | 195.0000 | 0.1981  | 74.8753  |
| 25.0000 | 214.0000 | 0.1788  | 67.2727  |
| 26.0000 | 237.0000 | 0.1762  | 70.4254  |
| 27.0000 | 265.0000 | 0.1554  | 61.7709  |
| 28.0000 | 285.0000 | 0.1514  | 62.3063  |
| 29.0000 | 304.0000 | 0.1499  | 64.4837  |
| 30.0000 | 328.0000 | 0.1546  | 73.4959  |
| 31.0000 | 343.0000 | 0.1477  | 69.8901  |
| 32.0000 | 367.0000 | 0.1367  | 64.2426  |
| 33.0000 | 395.0000 | 0.1027  | 34.1954  |
| 34.0000 | 416.0000 | 0.1054  | 41.1840  |
| 35.0000 | 437.0000 | 0.0833  | 18.8319  |
| 36.0000 | 456.0000 | 0.0648  | -1.0728  |
| 37.0000 | 480.0000 | 0.0564  | -7.7709  |
| 38.0000 | 491.0000 | 0.0454  | -21.3079 |
| 39.0000 | 506.0000 | 0.0405  | -26.0628 |
| 40.0000 | 517.0000 | 0.0331  | -36.0720 |
| 41.0000 | 527.0000 | 0.0256  | -46.5092 |
| 42.0000 | 537.0000 | 0.0187  | -56.7031 |
| 43.0000 | 549.0000 | 0.0153  | -60.7388 |
| 44.0000 | 552.0000 | 0.0125  | -65.4628 |
| 45.0000 | 560.0000 | -0.0011 | -90.9848 |
| 46.0000 | 562.0000 | -0.0018 | -91.9216 |
| 47.0000 | 564.0000 | -0.0044 | -97.2766 |
| 48.0000 | 568.0000 | 0.0023  | -81.5736 |
| 49.0000 | 569.0000 | 0.0032  | -79.3206 |
| 50.0000 | 569.0000 | 0.0032  | -79.3206 |
| 51.0000 | 574.0000 | -0.0000 | -86.6950 |

B\_1FJF

|         |          |        |         |
|---------|----------|--------|---------|
| 4.0000  | 2.0000   | 1.0119 | 15.3258 |
| 5.0000  | 2.0000   | 1.0119 | 15.3258 |
| 6.0000  | 2.0000   | 1.0119 | 15.3258 |
| 7.0000  | 7.0000   | 0.8193 | 27.2397 |
| 8.0000  | 8.0000   | 0.8375 | 30.1549 |
| 9.0000  | 9.0000   | 0.8516 | 34.3329 |
| 10.0000 | 13.0000  | 0.7327 | 36.1416 |
| 11.0000 | 17.0000  | 0.7013 | 44.1542 |
| 12.0000 | 20.0000  | 0.5906 | 35.8775 |
| 13.0000 | 23.0000  | 0.5350 | 34.4682 |
| 14.0000 | 35.0000  | 0.5402 | 56.4787 |
| 15.0000 | 41.0000  | 0.4017 | 35.4154 |
| 16.0000 | 51.0000  | 0.3280 | 29.2405 |
| 17.0000 | 59.0000  | 0.3261 | 36.8973 |
| 18.0000 | 67.0000  | 0.2689 | 26.7562 |
| 19.0000 | 85.0000  | 0.1781 | 8.9119  |
| 20.0000 | 91.0000  | 0.2027 | 22.4552 |
| 21.0000 | 101.0000 | 0.2150 | 33.7940 |

|         |          |         |          |
|---------|----------|---------|----------|
| 22.0000 | 112.0000 | 0.2250  | 44.3156  |
| 23.0000 | 128.0000 | 0.1639  | 22.0641  |
| 24.0000 | 141.0000 | 0.1199  | 4.5924   |
| 25.0000 | 153.0000 | 0.0924  | -6.8977  |
| 26.0000 | 164.0000 | 0.0837  | -7.5297  |
| 27.0000 | 177.0000 | 0.0642  | -16.3080 |
| 28.0000 | 185.0000 | 0.0762  | -4.3508  |
| 29.0000 | 191.0000 | 0.0724  | -5.2514  |
| 30.0000 | 198.0000 | 0.0609  | -12.9431 |
| 31.0000 | 205.0000 | 0.0462  | -24.3779 |
| 32.0000 | 209.0000 | 0.0563  | -13.2849 |
| 33.0000 | 214.0000 | 0.0359  | -33.3425 |
| 34.0000 | 216.0000 | 0.0284  | -41.3435 |
| 35.0000 | 219.0000 | 0.0248  | -44.6149 |
| 36.0000 | 222.0000 | 0.0304  | -36.4530 |
| 37.0000 | 225.0000 | 0.0297  | -36.2386 |
| 38.0000 | 227.0000 | 0.0241  | -43.5077 |
| 39.0000 | 228.0000 | 0.0247  | -42.3588 |
| 40.0000 | 228.0000 | 0.0247  | -42.3588 |
| 41.0000 | 232.0000 | 0.0085  | -67.3786 |
| 42.0000 | 233.0000 | -0.0006 | -82.6501 |
| 43.0000 | 234.0000 | -0.0000 | -81.1659 |

C\_1FJF

|         |          |         |          |
|---------|----------|---------|----------|
| 5.0000  | 1.0000   | 0.1405  | 1.8963   |
| 6.0000  | 4.0000   | -0.2350 | -10.5731 |
| 7.0000  | 4.0000   | -0.2350 | -10.5731 |
| 8.0000  | 8.0000   | 0.3151  | 21.1389  |
| 9.0000  | 10.0000  | 0.4027  | 28.2999  |
| 10.0000 | 15.0000  | 0.3083  | 22.8467  |
| 11.0000 | 16.0000  | 0.3480  | 27.4261  |
| 12.0000 | 22.0000  | 0.1884  | 12.3075  |
| 13.0000 | 29.0000  | 0.0283  | -7.9336  |
| 14.0000 | 33.0000  | 0.1066  | 8.4855   |
| 15.0000 | 40.0000  | 0.2146  | 33.2216  |
| 16.0000 | 52.0000  | 0.3090  | 60.2160  |
| 17.0000 | 63.0000  | 0.2639  | 52.2515  |
| 18.0000 | 75.0000  | 0.2308  | 46.8643  |
| 19.0000 | 82.0000  | 0.2077  | 41.5057  |
| 20.0000 | 95.0000  | 0.1626  | 30.2733  |
| 21.0000 | 103.0000 | 0.1206  | 15.3347  |
| 22.0000 | 121.0000 | 0.1333  | 27.0765  |
| 23.0000 | 134.0000 | 0.1024  | 15.3244  |
| 24.0000 | 140.0000 | 0.1246  | 29.4141  |
| 25.0000 | 156.0000 | 0.1163  | 29.5810  |
| 26.0000 | 166.0000 | 0.0650  | -1.3464  |
| 27.0000 | 179.0000 | 0.0155  | -33.1163 |
| 28.0000 | 188.0000 | 0.0103  | -35.2219 |
| 29.0000 | 191.0000 | 0.0184  | -27.9868 |
| 30.0000 | 194.0000 | 0.0196  | -26.3276 |
| 31.0000 | 198.0000 | 0.0219  | -23.4861 |
| 32.0000 | 201.0000 | 0.0162  | -28.5346 |
| 33.0000 | 203.0000 | 0.0149  | -29.4820 |
| 34.0000 | 203.0000 | 0.0149  | -29.4820 |
| 35.0000 | 204.0000 | 0.0119  | -32.7411 |
| 36.0000 | 206.0000 | 0.0000  | -46.9075 |

D\_1FJF

|         |          |         |          |
|---------|----------|---------|----------|
| 4.0000  | 0.0000   | NaN     | NaN      |
| 5.0000  | 1.0000   | 0.4110  | 8.7741   |
| 6.0000  | 3.0000   | 0.4318  | 10.6546  |
| 7.0000  | 4.0000   | -0.1297 | -13.3261 |
| 8.0000  | 5.0000   | -0.0216 | -5.7894  |
| 9.0000  | 7.0000   | 0.0806  | 2.7471   |
| 10.0000 | 15.0000  | -0.1099 | -9.3325  |
| 11.0000 | 20.0000  | -0.1466 | -14.7868 |
| 12.0000 | 26.0000  | -0.0227 | 0.7421   |
| 13.0000 | 30.0000  | 0.0130  | 5.8563   |
| 14.0000 | 37.0000  | 0.0468  | 10.7144  |
| 15.0000 | 44.0000  | 0.1178  | 25.0851  |
| 16.0000 | 53.0000  | 0.1551  | 34.5861  |
| 17.0000 | 63.0000  | 0.2262  | 55.6002  |
| 18.0000 | 73.0000  | 0.2147  | 54.6748  |
| 19.0000 | 89.0000  | 0.2027  | 53.9540  |
| 20.0000 | 107.0000 | 0.1055  | 20.8771  |
| 21.0000 | 123.0000 | 0.1158  | 28.0451  |
| 22.0000 | 138.0000 | 0.1273  | 36.1324  |
| 23.0000 | 149.0000 | 0.1273  | 38.0754  |
| 24.0000 | 163.0000 | 0.1069  | 29.4463  |
| 25.0000 | 172.0000 | 0.0999  | 27.4200  |
| 26.0000 | 181.0000 | 0.0740  | 12.6898  |
| 27.0000 | 186.0000 | 0.0776  | 16.2479  |
| 28.0000 | 193.0000 | 0.0552  | 0.9129   |
| 29.0000 | 199.0000 | 0.0518  | -0.7857  |
| 30.0000 | 201.0000 | 0.0332  | -16.3599 |
| 31.0000 | 203.0000 | 0.0191  | -28.6578 |
| 32.0000 | 206.0000 | 0.0071  | -39.9722 |
| 33.0000 | 208.0000 | -0.0000 | -47.0340 |
