# Supplementary material
Source: PubMed Central journal article supplement (PMC33152)
Supplement: pnas_081086198_3.pdf [file pnas_081086198_3.pdf]

Incorrect decoys

1bp2

|    |     |            |
|----|-----|------------|
| 1  | 0   | 0.0000     |
| 2  | 1   | -2.8196    |
| 3  | 1   | -2.8196    |
| 4  | 2   | -4.1636    |
| 5  | 3   | -6.2634    |
| 6  | 4   | -29.8309   |
| 7  | 6   | -39.2533   |
| 8  | 10  | -34.4634   |
| 9  | 13  | -128.7075  |
| 10 | 17  | 147.7276   |
| 11 | 32  | 557.5358   |
| 12 | 39  | 288.6926   |
| 13 | 47  | 774.9755   |
| 14 | 60  | -336.7150  |
| 15 | 75  | 178.7196   |
| 16 | 87  | 416.9039   |
| 17 | 101 | 440.3244   |
| 18 | 114 | -1484.7105 |
| 19 | 118 | -856.6533  |
| 20 | 122 | -216.6101  |
| 21 | 123 | -38.4547   |

\*\*\*\*\*

11h1

|    |     |            |
|----|-----|------------|
| 1  | 0   | 0.0000     |
| 2  | 0   | 0.0000     |
| 3  | 0   | 0.0000     |
| 4  | 0   | 0.0000     |
| 5  | 1   | 19.9182    |
| 6  | 2   | -31.7540   |
| 7  | 4   | -28.2135   |
| 8  | 9   | -53.8498   |
| 9  | 12  | -9.2993    |
| 10 | 20  | -147.4452  |
| 11 | 30  | 310.2102   |
| 12 | 39  | 699.1728   |
| 13 | 50  | 183.9863   |
| 14 | 64  | -294.9506  |
| 15 | 73  | -875.2742  |
| 16 | 83  | -497.5080  |
| 17 | 96  | -965.4630  |
| 18 | 114 | -531.9841  |
| 19 | 123 | 376.8313   |
| 20 | 130 | -447.6224  |
| 21 | 136 | -976.3329  |
| 22 | 144 | -1319.6948 |
| 23 | 148 | -1583.0992 |
| 24 | 149 | -1393.1990 |
| 25 | 152 | 289.7787   |
| 26 | 153 | 929.9699   |

\*\*\*\*\*

1p2p

|    |    |           |
|----|----|-----------|
| 1  | 0  | 0.0000    |
| 2  | 0  | 0.0000    |
| 3  | 1  | 2.0755    |
| 4  | 1  | 2.0755    |
| 5  | 1  | 2.0755    |
| 6  | 4  | 15.5141   |
| 7  | 5  | 32.9306   |
| 8  | 7  | -59.2079  |
| 9  | 8  | -56.4156  |
| 10 | 13 | 199.7159  |
| 11 | 18 | 119.8105  |
| 12 | 23 | 345.8480  |
| 13 | 29 | 964.8702  |
| 14 | 41 | -117.1634 |
| 15 | 47 | -261.1983 |
| 16 | 61 | 700.5449  |
| 17 | 65 | -151.5967 |
| 18 | 76 | 23.2502   |

|    |     |            |
|----|-----|------------|
| 19 | 84  | -302.8406  |
| 20 | 94  | -1650.3627 |
| 21 | 104 | -2202.1479 |
| 22 | 108 | -2983.5894 |
| 23 | 115 | -670.7825  |
| 24 | 116 | -432.7801  |
| 25 | 122 | -200.0727  |
| 26 | 124 | -658.6315  |

\*\*\*\*\*

lrei

|    |     |           |
|----|-----|-----------|
| 1  | 0   | 0.000     |
| 2  | 1   | 5.114     |
| 3  | 1   | 5.114     |
| 4  | 1   | 5.114     |
| 5  | 2   | -18.442   |
| 6  | 3   | 23.825    |
| 7  | 7   | 41.727    |
| 8  | 12  | 48.727    |
| 9  | 16  | -21.055   |
| 10 | 19  | 61.882    |
| 11 | 25  | 121.014   |
| 12 | 31  | -321.058  |
| 13 | 39  | -906.143  |
| 14 | 46  | -532.000  |
| 15 | 57  | -321.236  |
| 16 | 68  | 542.574   |
| 17 | 84  | -818.272  |
| 18 | 100 | 197.014   |
| 19 | 113 | 39.383    |
| 20 | 130 | -1148.885 |
| 21 | 153 | 167.266   |
| 22 | 162 | 711.133   |
| 23 | 175 | 1944.991  |
| 24 | 190 | 702.522   |
| 25 | 199 | 1689.689  |
| 26 | 204 | 476.041   |
| 27 | 210 | -1570.346 |
| 28 | 211 | -534.099  |
| 29 | 212 | -330.054  |

\*\*\*\*\*

lrhd

|    |     |            |
|----|-----|------------|
| 3  | 0   | 0.0000     |
| 4  | 1   | -28.2237   |
| 5  | 2   | -42.9316   |
| 6  | 3   | -63.4379   |
| 7  | 4   | -13.3963   |
| 8  | 6   | -137.2293  |
| 9  | 11  | 15.5830    |
| 10 | 13  | 138.2942   |
| 11 | 20  | 124.4949   |
| 12 | 27  | 291.3191   |
| 13 | 29  | 345.1313   |
| 14 | 38  | -386.7728  |
| 15 | 51  | -791.0283  |
| 16 | 61  | 246.6003   |
| 17 | 84  | -366.4866  |
| 18 | 104 | -1061.5301 |
| 19 | 123 | -1874.9622 |
| 20 | 139 | -2782.4477 |
| 21 | 153 | -1599.3174 |
| 22 | 175 | 1891.6920  |
| 23 | 197 | 3634.2871  |
| 24 | 218 | 6295.7529  |
| 25 | 232 | 3715.9918  |
| 26 | 250 | 6766.0893  |
| 27 | 261 | 4029.0117  |
| 28 | 273 | 2619.0900  |
| 29 | 282 | 3615.0057  |
| 30 | 285 | 1975.9309  |
| 31 | 287 | 2560.4448  |
| 32 | 289 | 429.4803   |
| 33 | 291 | 2363.8402  |
| 34 | 292 | 1572.1334  |
| 35 | 293 | -118.6920  |

\*\*\*\*\*

lrn3

|    |     |           |
|----|-----|-----------|
| 5  | 1   | -5.3125   |
| 6  | 2   | -2.6116   |
| 7  | 4   | -59.6861  |
| 8  | 6   | -53.8083  |
| 9  | 11  | 114.8312  |
| 10 | 13  | 50.7456   |
| 11 | 19  | 358.6622  |
| 12 | 25  | 510.4569  |
| 13 | 32  | 690.0678  |
| 14 | 45  | 483.5989  |
| 15 | 52  | 140.8051  |
| 16 | 62  | 93.0635   |
| 17 | 71  | -655.4405 |
| 18 | 82  | -760.8743 |
| 19 | 96  | -56.0613  |
| 20 | 100 | -909.4521 |
| 21 | 108 | -757.2831 |
| 22 | 116 | 175.0191  |
| 23 | 119 | -574.7439 |
| 24 | 120 | -739.3242 |
| 25 | 124 | -268.7230 |

\*\*\*\*\*a

2cdv

|    |     |            |
|----|-----|------------|
| 4  | 1   | -16.0084   |
| 5  | 1   | -16.0084   |
| 6  | 2   | 30.1499    |
| 7  | 4   | 125.2054   |
| 8  | 6   | 178.5373   |
| 9  | 8   | 170.3886   |
| 10 | 11  | 116.2434   |
| 11 | 18  | 310.2472   |
| 12 | 25  | 148.8319   |
| 13 | 29  | -29.5642   |
| 14 | 40  | 200.1473   |
| 15 | 52  | -488.6728  |
| 16 | 63  | -598.2340  |
| 17 | 68  | -414.4584  |
| 18 | 76  | -1621.3431 |
| 19 | 87  | -3160.9232 |
| 20 | 94  | -2253.9181 |
| 21 | 97  | -1903.2607 |
| 22 | 100 | -1206.5808 |
| 23 | 104 | -267.3293  |
| 24 | 107 | 535.6903   |
| 25 | 107 | 535.6903   |

\*\*\*\*\*

2cyp

|    |     |            |
|----|-----|------------|
| 3  | 1   | 4.1516     |
| 4  | 4   | 21.8191    |
| 5  | 4   | 21.8191    |
| 6  | 5   | -5.0460    |
| 7  | 6   | 14.7649    |
| 8  | 11  | 77.0662    |
| 9  | 13  | 146.1070   |
| 10 | 17  | 27.3451    |
| 11 | 18  | 168.7968   |
| 12 | 24  | 146.8515   |
| 13 | 32  | 238.7300   |
| 14 | 41  | 384.0866   |
| 15 | 49  | 395.6159   |
| 16 | 59  | -337.6302  |
| 17 | 72  | 246.7625   |
| 18 | 84  | -378.5480  |
| 19 | 102 | -3177.3162 |
| 20 | 117 | -5438.9162 |
| 21 | 131 | -6989.0454 |
| 22 | 151 | -6295.5265 |
| 23 | 163 | -7677.8409 |
| 24 | 183 | -3661.8989 |
| 25 | 206 | -5158.8480 |
| 26 | 224 | 1118.4023  |
| 27 | 245 | 1431.7480  |
| 28 | 257 | -1106.4337 |
| 29 | 272 | 1160.4312  |
| 30 | 278 | 720.7797   |
| 31 | 285 | 5808.8295  |

32 290 2949.4305  
33 290 2949.4305  
34 293 4074.5711

\*\*\*\*\*

2ilb

5 1 26.9959  
6 2 36.5825  
7 3 89.9482  
8 5 29.8952  
9 9 -8.9009  
10 14 150.8541  
11 16 -120.3301  
12 21 -477.0632  
13 36 -563.9722  
14 44 -159.9715  
15 49 -229.2019  
16 59 -89.1627  
17 73 961.4715  
18 85 1562.8379  
19 98 2533.6999  
20 110 1266.7076  
21 125 183.3666  
22 133 68.2074  
23 138 -1027.2304  
24 143 -1191.7874  
25 149 -674.7700  
26 152 -350.1669  
27 152 -350.1669  
28 153 -455.5342

\*\*\*\*\*

2paz

5 1 22.5509  
6 1 22.5509  
7 4 154.5199  
8 5 135.2088  
9 9 207.0322  
10 13 -141.5766  
11 22 214.4442  
12 27 85.7345  
13 33 -167.5650  
14 41 -437.5190  
15 51 456.1087  
16 58 226.9144  
17 68 286.9973  
18 81 -1374.1567  
19 90 -485.1738  
20 100 -1228.4794  
21 106 -88.2545  
22 113 -796.3644  
23 115 -412.3628  
24 119 703.8929  
25 119 703.8929  
26 122 -254.4465  
27 123 -1460.1888

\*\*\*\*\*

2ssi

5 2 21.2048  
6 2 21.2048  
7 4 82.8822  
8 4 82.8822  
9 8 93.4823  
10 13 -198.4036  
11 18 -132.8657  
12 29 89.9115  
13 37 596.8502  
14 47 847.7508  
15 58 240.3783  
16 66 445.8183  
17 76 554.0252  
18 89 1570.7282  
19 94 1115.9257  
20 99 368.2885  
21 103 -1078.8901  
22 105 -789.3323  
23 105 -789.3323  
24 107 -1927.4919

\*\*\*\*\*

2tmn

|    |     |            |
|----|-----|------------|
| 4  | 1   | 0.9951     |
| 5  | 1   | 0.9951     |
| 6  | 3   | -32.8501   |
| 7  | 5   | 34.3577    |
| 8  | 8   | -90.7258   |
| 9  | 9   | -10.2494   |
| 10 | 11  | -100.3090  |
| 11 | 17  | 70.1183    |
| 12 | 21  | -199.0256  |
| 13 | 26  | -95.6504   |
| 14 | 35  | -729.4877  |
| 15 | 40  | -1228.7762 |
| 16 | 47  | -1387.2704 |
| 17 | 61  | -383.0795  |
| 18 | 78  | 2721.8968  |
| 19 | 93  | 2996.3773  |
| 20 | 108 | 4506.9983  |
| 21 | 124 | 1033.8991  |
| 22 | 143 | -1960.0753 |
| 23 | 165 | 1233.6380  |
| 24 | 176 | 1097.9680  |
| 25 | 193 | -880.8699  |
| 26 | 218 | -1158.3182 |
| 27 | 231 | 2941.4155  |
| 28 | 249 | -1412.8721 |
| 29 | 266 | 1177.7594  |
| 30 | 278 | -1422.4248 |
| 31 | 287 | 1473.1723  |
| 32 | 296 | 3725.0726  |
| 33 | 304 | 293.3775   |
| 34 | 308 | 973.8417   |
| 35 | 313 | 3413.2456  |
| 36 | 314 | 5045.4027  |
| 37 | 314 | 5045.4027  |
| 38 | 315 | 3753.4087  |
| 39 | 315 | 3753.4087  |
| 40 | 316 | -703.7395  |

\*\*\*\*\*

2ts1

|    |     |            |
|----|-----|------------|
| 6  | 4   | -66.8894   |
| 7  | 7   | -1.3410    |
| 8  | 11  | 110.8132   |
| 9  | 13  | 200.2740   |
| 10 | 14  | 188.5807   |
| 11 | 16  | 457.2250   |
| 12 | 20  | 464.1678   |
| 13 | 28  | 1022.4620  |
| 14 | 37  | 851.4174   |
| 15 | 47  | 1067.1117  |
| 16 | 56  | 84.6729    |
| 17 | 65  | 732.0720   |
| 18 | 71  | 1208.0815  |
| 19 | 84  | 2788.8569  |
| 20 | 104 | 1504.7544  |
| 21 | 122 | -2901.2673 |
| 22 | 138 | -2550.0644 |
| 23 | 155 | -3220.5054 |
| 24 | 177 | -2527.6117 |
| 25 | 186 | -2152.6736 |
| 26 | 200 | 2.7627     |
| 27 | 221 | -902.3584  |
| 28 | 246 | -7315.6040 |
| 29 | 261 | -4730.5887 |
| 30 | 275 | -5993.7390 |
| 31 | 286 | -8226.1834 |
| 32 | 293 | -8813.2746 |
| 33 | 303 | -4888.4640 |
| 34 | 308 | -3067.6265 |
| 35 | 309 | -1857.1815 |
| 36 | 313 | 111.8095   |
| 37 | 315 | 397.6133   |
| 38 | 317 | -1422.3692 |

\*\*\*\*\*

5pad

|    |     |            |
|----|-----|------------|
| 6  | 1   | -24.9986   |
| 7  | 3   | -89.3979   |
| 8  | 7   | -5.2144    |
| 9  | 9   | -270.0157  |
| 10 | 12  | -379.1909  |
| 11 | 20  | 25.0510    |
| 12 | 26  | -90.4229   |
| 13 | 34  | 59.1039    |
| 14 | 40  | -227.1021  |
| 15 | 49  | -985.2579  |
| 16 | 55  | -1453.8775 |
| 17 | 63  | -2132.4366 |
| 18 | 75  | -1301.0285 |
| 19 | 89  | -1329.3650 |
| 20 | 106 | 764.6578   |
| 21 | 124 | 4305.1240  |
| 22 | 133 | 5451.4620  |
| 23 | 150 | 4822.7671  |
| 24 | 163 | 2579.6875  |
| 25 | 175 | -2807.2529 |
| 26 | 185 | -3716.3350 |
| 27 | 193 | -534.0427  |
| 28 | 198 | -1526.0097 |
| 29 | 205 | 26.2902    |
| 30 | 208 | 259.6673   |
| 31 | 209 | 1244.1203  |
| 32 | 211 | 2176.0572  |
| 33 | 212 | 2422.7538  |

\*\*\*\*\*
