# Supplementary material
Source: PubMed Central journal article supplement (PMC33152)

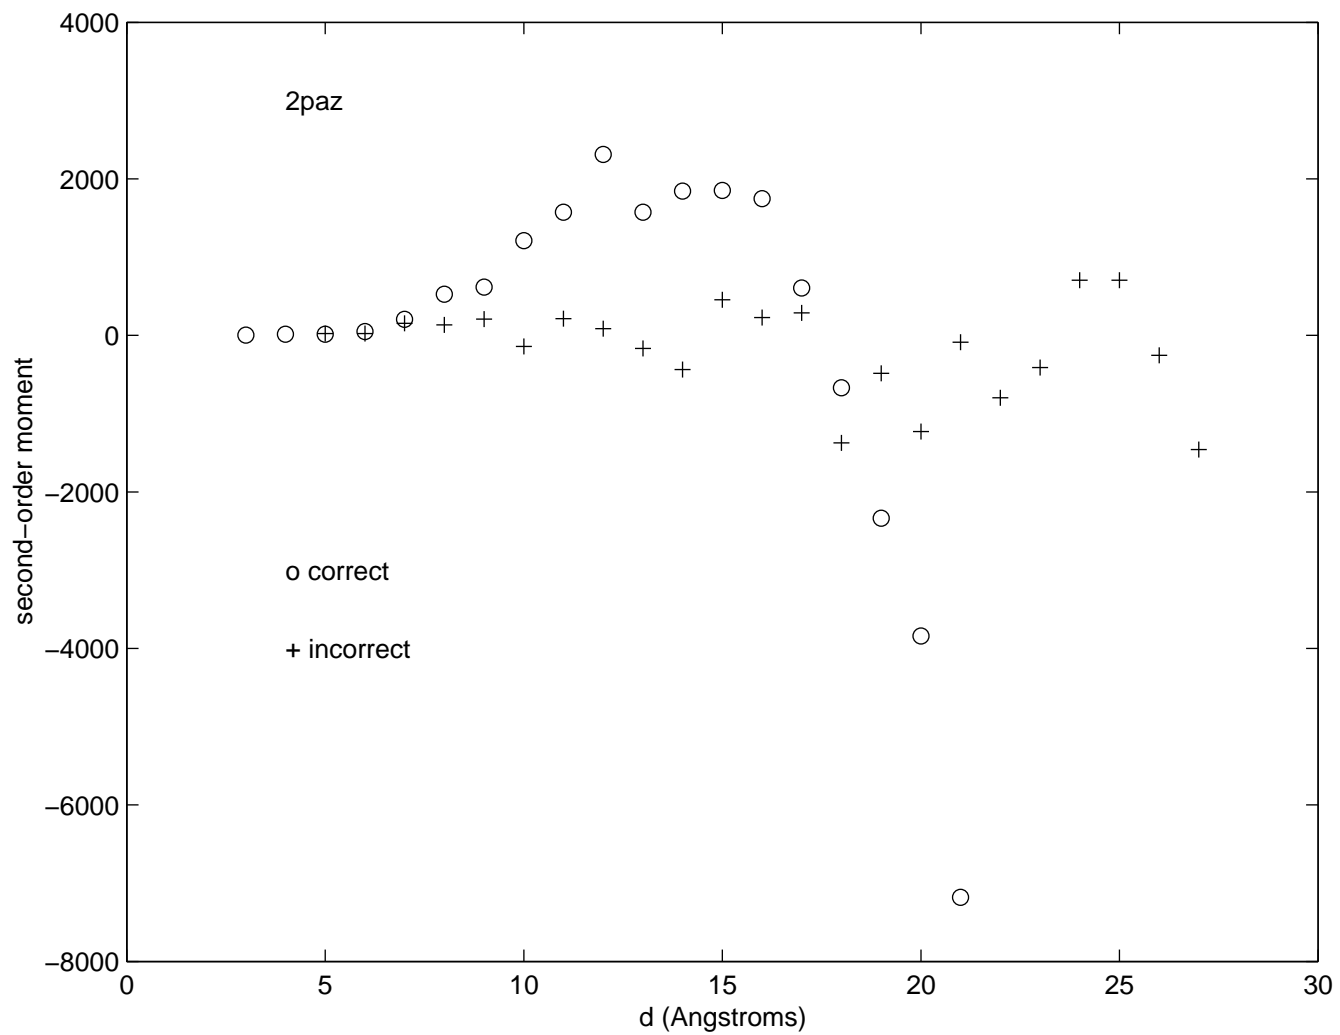

## 2paz

| correct |     |            | incorrect |     |            |
|---------|-----|------------|-----------|-----|------------|
| d       | num | sec-order  | d         | num | sec-order  |
| 3       | 1   | 3.9683     | 5         | 1   | 22.5509    |
| 4       | 2   | 15.6601    | 6         | 1   | 22.5509    |
| 5       | 2   | 15.6601    | 7         | 4   | 154.5199   |
| 6       | 3   | 49.7857    | 8         | 5   | 135.2088   |
| 7       | 6   | 205.6772   | 9         | 9   | 207.0322   |
| 8       | 12  | 526.6434   | 10        | 13  | -141.5766  |
| 9       | 14  | 616.5243   | 11        | 22  | 214.4442   |
| 10      | 21  | 1208.9126  | 12        | 27  | 85.7345    |
| 11      | 29  | 1572.6848  | 13        | 33  | -167.5650  |
| 12      | 38  | 2310.8624  | 14        | 41  | -437.5190  |
| 13      | 49  | 1572.9578  | 15        | 51  | 456.1087   |
| 14      | 56  | 1844.3393  | 16        | 58  | 226.9144   |
| 15      | 64  | 1853.1497  | 17        | 68  | 286.9973   |
| 16      | 76  | 1748.0753  | 18        | 81  | -1374.1567 |
| 17      | 91  | 606.4480   | 19        | 90  | -485.1738  |
| 18      | 104 | -669.7477  | 20        | 100 | -1228.4794 |
| 19      | 114 | -2335.5989 | 21        | 106 | -88.2545   |
| 20      | 118 | -3841.6361 | 22        | 113 | -796.3644  |
| 21      | 123 | -7181.1767 | 23        | 115 | -412.3628  |
|         |     |            | 24        | 119 | 703.8929   |
|         |     |            | 25        | 119 | 703.8929   |
|         |     |            | 26        | 122 | -254.4465  |
|         |     |            | 27        | 123 | -1460.1888 |

Supplement: pnas_081086198_13.pdf [file pnas_081086198_13.pdf]

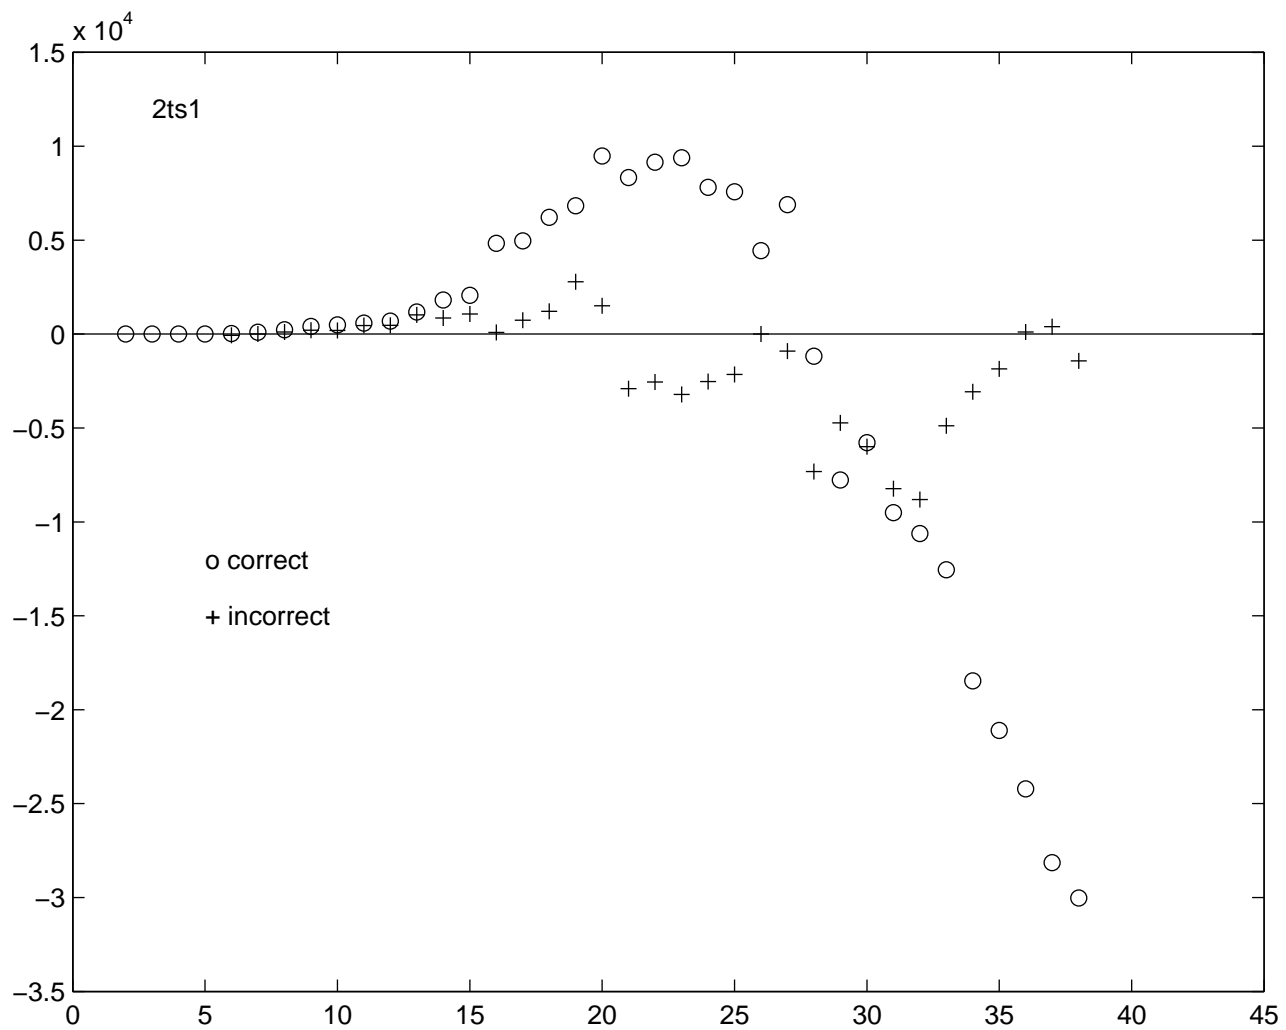

## 2ts1

| correct |     |             | incorrect |     |            |
|---------|-----|-------------|-----------|-----|------------|
| d       | num | sec-order   | d         | num | sec-order  |
| 2       | 1   | -0.0361     | 6         | 4   | -66.8894   |
| 3       | 1   | -0.0361     | 7         | 7   | -1.3410    |
| 4       | 1   | -0.0361     | 8         | 11  | 110.8132   |
| 5       | 1   | -0.0361     | 9         | 13  | 200.2740   |
| 6       | 3   | 24.1044     | 10        | 14  | 188.5807   |
| 7       | 5   | 103.5532    | 11        | 16  | 457.2250   |
| 8       | 8   | 232.2737    | 12        | 20  | 464.1678   |
| 9       | 11  | 404.0072    | 13        | 28  | 1022.4620  |
| 10      | 15  | 485.9400    | 14        | 37  | 851.4174   |
| 11      | 18  | 578.7499    | 15        | 47  | 1067.1117  |
| 12      | 23  | 692.3724    | 16        | 56  | 84.6729    |
| 13      | 29  | 1172.4955   | 17        | 65  | 732.0720   |
| 14      | 38  | 1817.9448   | 18        | 71  | 1208.0815  |
| 15      | 49  | 2061.8284   | 19        | 84  | 2788.8569  |
| 16      | 61  | 4825.2569   | 20        | 104 | 1504.7544  |
| 17      | 70  | 4963.3623   | 21        | 122 | -2901.2673 |
| 18      | 86  | 6211.5253   | 22        | 138 | -2550.0644 |
| 19      | 95  | 6832.8759   | 23        | 155 | -3220.5054 |
| 20      | 111 | 9477.4310   | 24        | 177 | -2527.6117 |
| 21      | 128 | 8333.7712   | 25        | 186 | -2152.6736 |
| 22      | 142 | 9147.3447   | 26        | 200 | 2.7627     |
| 23      | 158 | 9386.9297   | 27        | 221 | -902.3584  |
| 24      | 176 | 7807.6671   | 28        | 246 | -7315.6040 |
| 25      | 188 | 7578.1011   | 29        | 261 | -4730.5887 |
| 26      | 212 | 4446.2568   | 30        | 275 | -5993.7390 |
| 27      | 226 | 6891.3080   | 31        | 286 | -8226.1834 |
| 28      | 245 | -1178.0153  | 32        | 293 | -8813.2746 |
| 29      | 263 | -7763.9542  | 33        | 303 | -4888.4640 |
| 30      | 274 | -5785.3260  | 34        | 308 | -3067.6265 |
| 31      | 288 | -9508.3761  | 35        | 309 | -1857.1815 |
| 32      | 293 | -10622.0854 | 36        | 313 | 111.8095   |
| 33      | 299 | -12547.1377 | 37        | 315 | 397.6133   |
| 34      | 306 | -18462.6689 | 38        | 317 | -1422.3692 |
| 35      | 310 | -21107.8062 |           |     |            |
| 36      | 313 | -24215.0089 |           |     |            |
| 37      | 315 | -28145.6317 |           |     |            |
| 38      | 317 | -30030.4251 |           |     |            |

Supplement: pnas_081086198_16.pdf [file pnas_081086198_16.pdf]

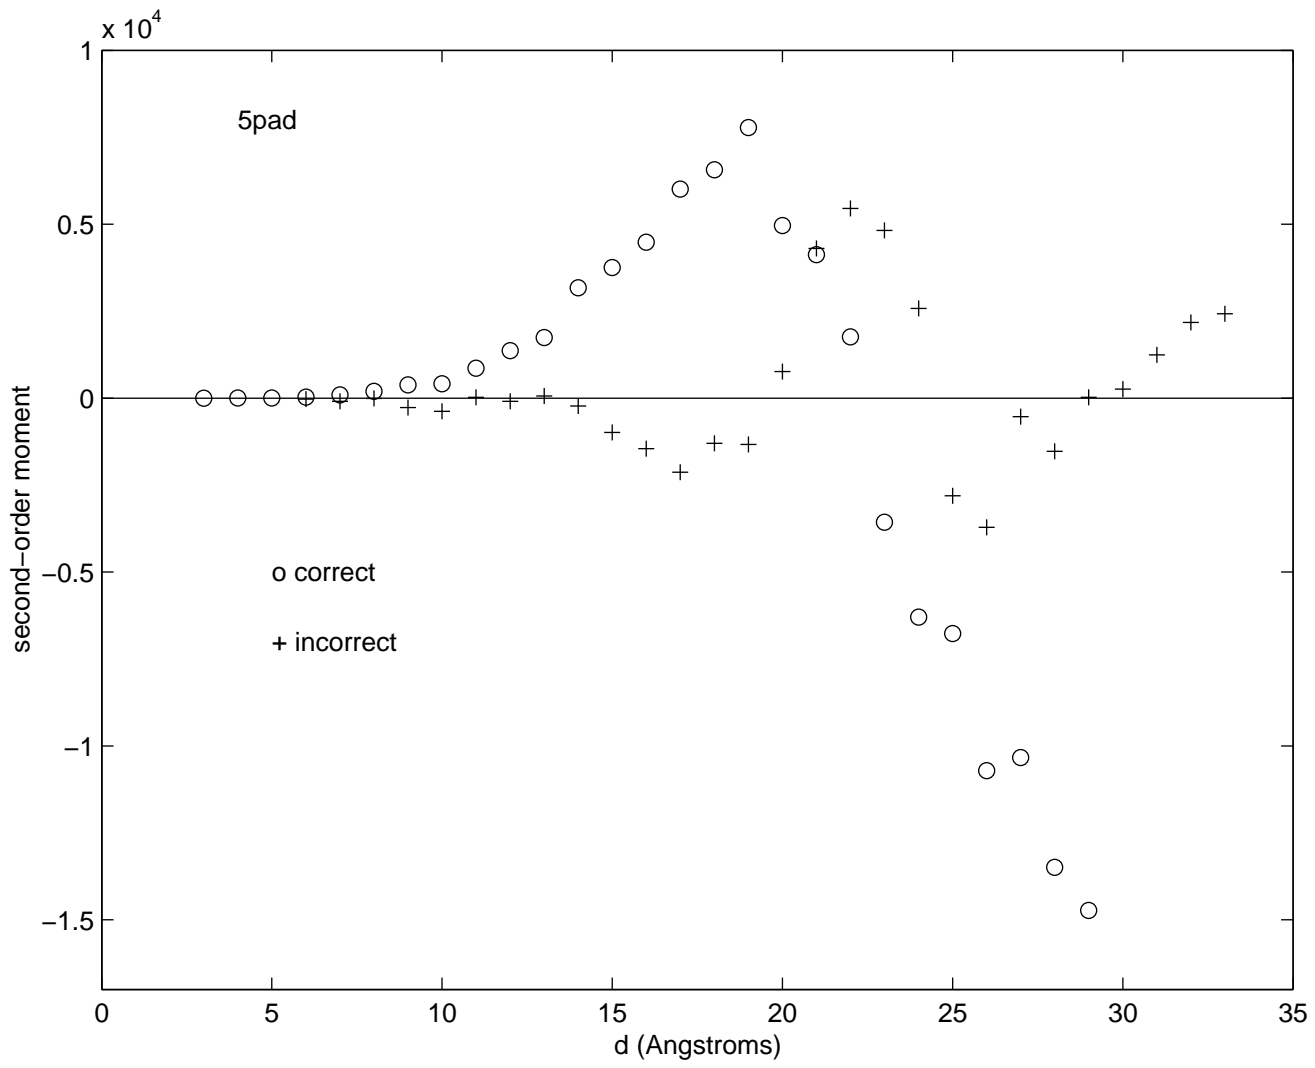

## 5pad

| correct |     |             | incorrect |     |            |
|---------|-----|-------------|-----------|-----|------------|
| d       | num | sec-moment  | d         | num | sec-moment |
| 3       | 1   | -1.3264     | 6         | 1   | -24.9986   |
| 4       | 2   | 5.2722      | 7         | 3   | -89.3979   |
| 5       | 2   | 5.2722      | 8         | 7   | -5.2144    |
| 6       | 4   | 27.1850     | 9         | 9   | -270.0157  |
| 7       | 7   | 94.1812     | 10        | 12  | -379.1909  |
| 8       | 9   | 194.6902    | 11        | 20  | 25.0510    |
| 9       | 13  | 380.5995    | 12        | 26  | -90.4229   |
| 10      | 17  | 413.4226    | 13        | 34  | 59.1039    |
| 11      | 23  | 860.0693    | 14        | 40  | -227.1021  |
| 12      | 34  | 1366.6361   | 15        | 49  | -985.2579  |
| 13      | 38  | 1743.8683   | 16        | 55  | -1453.8775 |
| 14      | 50  | 3172.9482   | 17        | 63  | -2132.4366 |
| 15      | 55  | 3753.3955   | 18        | 75  | -1301.0285 |
| 16      | 72  | 4484.5735   | 19        | 89  | -1329.3650 |
| 17      | 89  | 6009.5316   | 20        | 106 | 764.6578   |
| 18      | 100 | 6563.8990   | 21        | 124 | 4305.1240  |
| 19      | 116 | 7778.6801   | 22        | 133 | 5451.4620  |
| 20      | 131 | 4963.8035   | 23        | 150 | 4822.7671  |
| 21      | 148 | 4124.7775   | 24        | 163 | 2579.6875  |
| 22      | 165 | 1761.9563   | 25        | 175 | -2807.2529 |
| 23      | 181 | -3566.0295  | 26        | 185 | -3716.3350 |
| 24      | 190 | -6297.2299  | 27        | 193 | -534.0427  |
| 25      | 199 | -6767.8795  | 28        | 198 | -1526.0097 |
| 26      | 204 | -10712.4526 | 29        | 205 | 26.2902    |
| 27      | 208 | -10330.8049 | 30        | 208 | 259.6673   |
| 28      | 211 | -13488.9431 | 31        | 209 | 1244.1203  |
| 29      | 212 | -14729.1313 | 32        | 211 | 2176.0572  |
|         |     |             | 33        | 212 | 2422.7538  |

Rt=23/29=0.79

Supplement: pnas_081086198_17.pdf [file pnas_081086198_17.pdf]

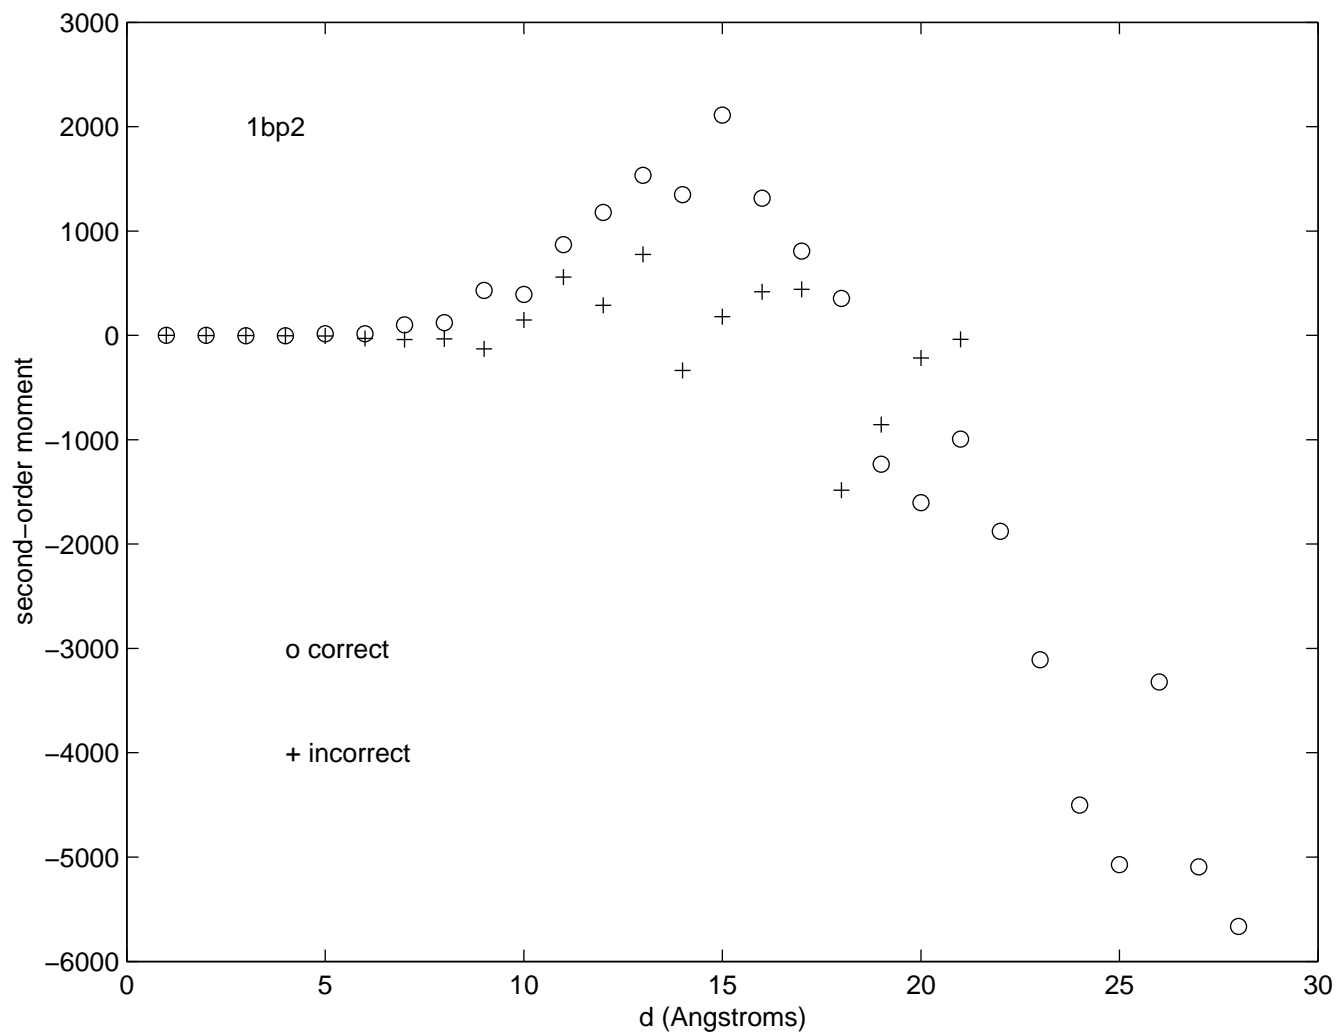

| Correct |     |              | incorrect |     |            |
|---------|-----|--------------|-----------|-----|------------|
| d       | num | second-order | d         | num | sec-order  |
| 1       | 0   | 0.0000       | 1         | 0   | 0.0000     |
| 2       | 0   | 0.0000       | 2         | 1   | -2.8196    |
| 3       | 1   | -2.9351      | 3         | 1   | -2.8196    |
| 4       | 1   | -2.9351      | 4         | 2   | -4.1636    |
| 5       | 4   | 14.9609      | 5         | 3   | -6.2634    |
| 6       | 4   | 14.9609      | 6         | 4   | -29.8309   |
| 7       | 6   | 100.0872     | 7         | 6   | -39.2533   |
| 8       | 7   | 121.0008     | 8         | 10  | -34.4634   |
| 9       | 12  | 431.4712     | 9         | 13  | -128.7075  |
| 10      | 14  | 391.6827     | 10        | 17  | 147.7276   |
| 11      | 19  | 868.8847     | 11        | 32  | 557.5358   |
| 12      | 22  | 1177.3520    | 12        | 39  | 288.6926   |
| 13      | 29  | 1533.4504    | 13        | 47  | 774.9755   |
| 14      | 41  | 1347.7397    | 14        | 60  | -336.7150  |
| 15      | 49  | 2111.5462    | 15        | 75  | 178.7196   |
| 16      | 61  | 1314.3881    | 16        | 87  | 416.9039   |
| 17      | 73  | 807.2350     | 17        | 101 | 440.3244   |
| 18      | 78  | 354.7001     | 18        | 114 | -1484.7105 |
| 19      | 91  | -1233.9085   | 19        | 118 | -856.6533  |
| 20      | 98  | -1602.4942   | 20        | 122 | -216.6101  |
| 21      | 105 | -993.3777    | 21        | 123 | -38.4547   |
| 22      | 110 | -1877.3970   |           |     |            |
| 23      | 114 | -3109.8975   |           |     |            |
| 24      | 117 | -4502.1210   |           |     |            |
| 25      | 118 | -5073.0123   |           |     |            |
| 26      | 120 | -3321.1789   |           |     |            |
| 27      | 122 | -5093.1775   |           |     |            |
| 28      | 123 | -5665.0424   |           |     |            |

Supplement: pnas_081086198_4.pdf [file pnas_081086198_4.pdf]

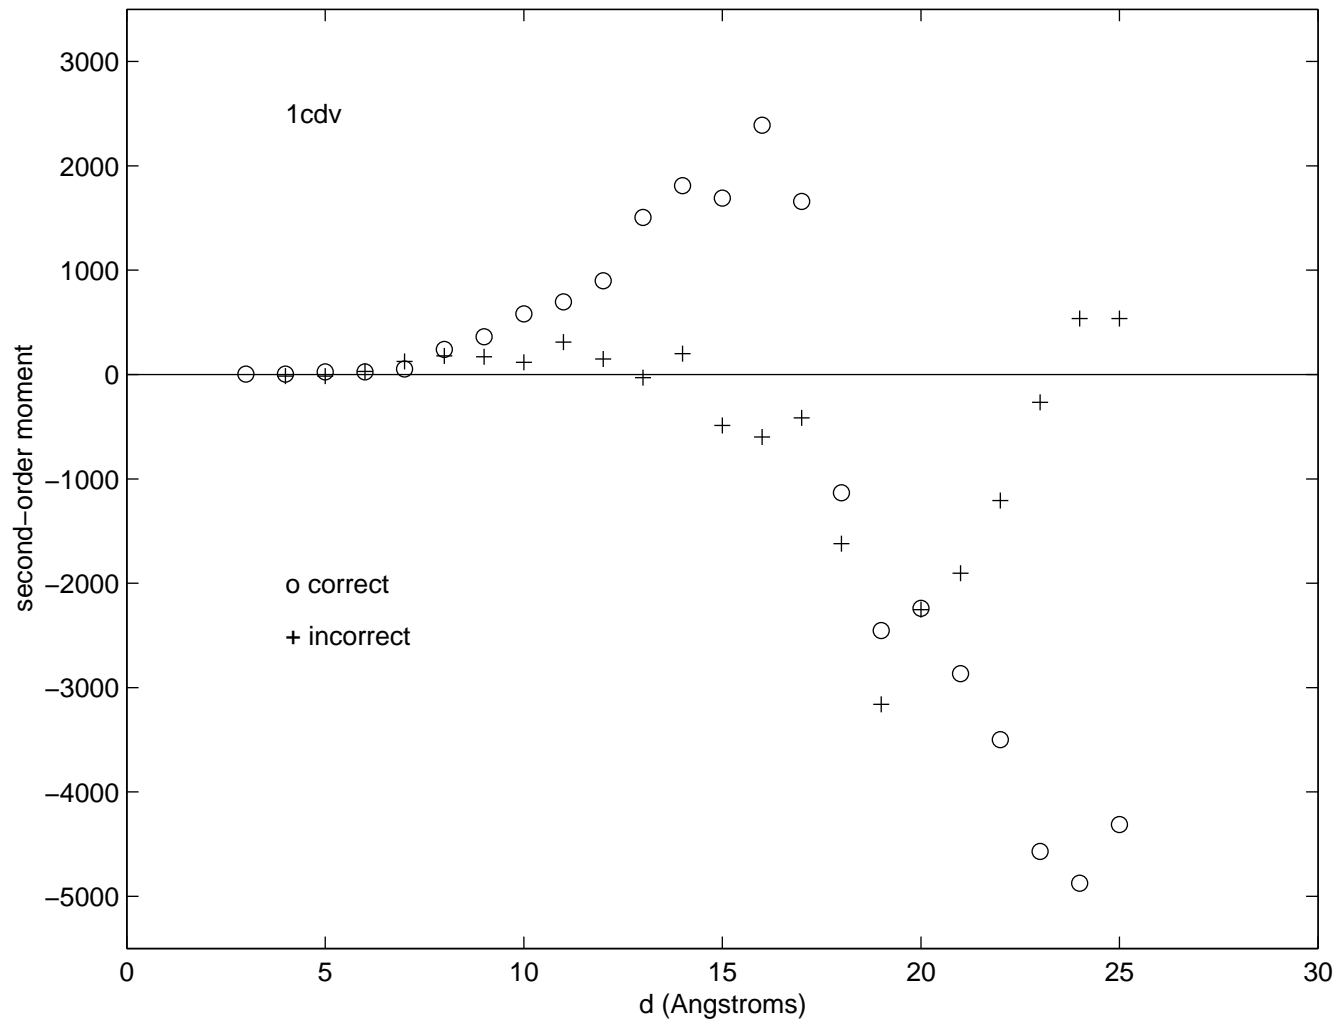

lcdv

| correct |     |            | incorrect |     |            |
|---------|-----|------------|-----------|-----|------------|
| d       | num | sec-order  | d         | num | sec-order  |
| 3       | 1   | 3.1903     | 4         | 1   | -16.0084   |
| 4       | 1   | 3.1903     | 5         | 1   | -16.0084   |
| 5       | 2   | 26.1648    | 6         | 2   | 30.1499    |
| 6       | 2   | 26.1648    | 7         | 4   | 125.2054   |
| 7       | 3   | 53.1560    | 8         | 6   | 178.5373   |
| 8       | 7   | 241.4455   | 9         | 8   | 170.3886   |
| 9       | 11  | 362.6591   | 10        | 11  | 116.2434   |
| 10      | 16  | 581.2312   | 11        | 18  | 310.2472   |
| 11      | 19  | 695.6627   | 12        | 25  | 148.8319   |
| 12      | 22  | 897.7911   | 13        | 29  | -29.5642   |
| 13      | 30  | 1505.8467  | 14        | 40  | 200.1473   |
| 14      | 40  | 1809.7029  | 15        | 52  | -488.6728  |
| 15      | 47  | 1691.2659  | 16        | 63  | -598.2340  |
| 16      | 58  | 2389.5188  | 17        | 68  | -414.4584  |
| 17      | 70  | 1658.3415  | 18        | 76  | -1621.3431 |
| 18      | 82  | -1132.2545 | 19        | 87  | -3160.9232 |
| 19      | 89  | -2453.5750 | 20        | 94  | -2253.9181 |
| 20      | 93  | -2240.0954 | 21        | 97  | -1903.2607 |
| 21      | 96  | -2866.4940 | 22        | 100 | -1206.5808 |
| 22      | 101 | -3499.0824 | 23        | 104 | -267.3293  |
| 23      | 104 | -4570.3412 | 24        | 107 | 535.6903   |
| 24      | 106 | -4873.9073 | 25        | 107 | 535.6903   |
| 25      | 107 | -4312.3084 |           |     |            |

$R_t=18/25=0.72$

Supplement: pnas_081086198_5.pdf [file pnas_081086198_5.pdf]

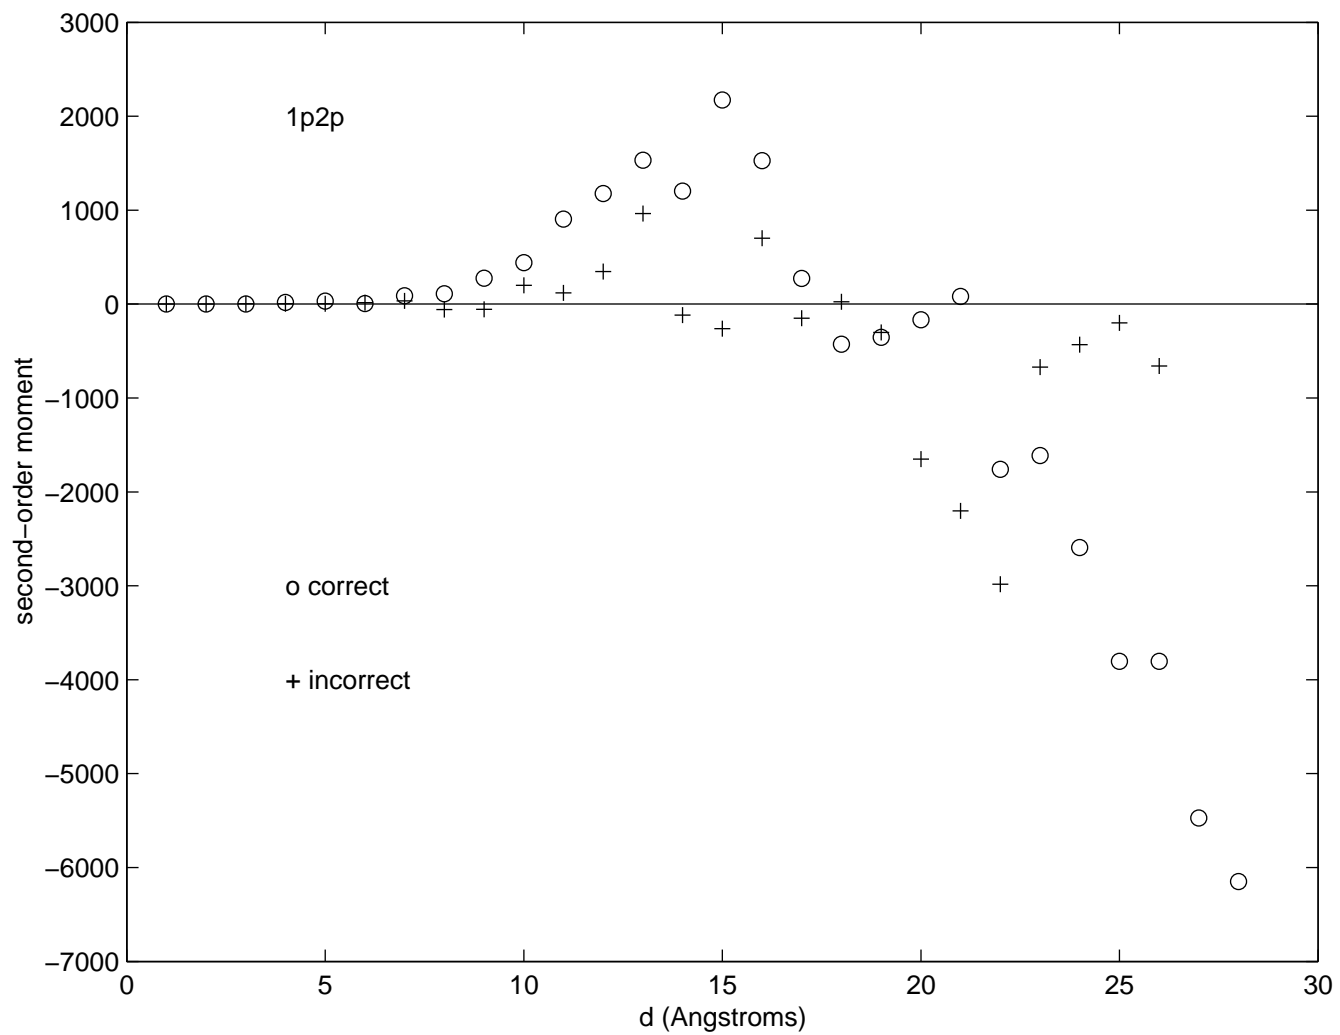

1p2p

| correct |     |            | incorrect |     |            |
|---------|-----|------------|-----------|-----|------------|
| d       | num | sec-order  | d         | num | sec-order  |
| 1       | 0   | 0.0000     | 1         | 0   | 0.0000     |
| 2       | 0   | 0.0000     | 2         | 0   | 0.0000     |
| 3       | 0   | 0.0000     | 3         | 1   | 2.0755     |
| 4       | 2   | 16.3874    | 4         | 1   | 2.0755     |
| 5       | 3   | 32.0875    | 5         | 1   | 2.0755     |
| 6       | 4   | 5.1678     | 6         | 4   | 15.5141    |
| 7       | 6   | 88.6297    | 7         | 5   | 32.9306    |
| 8       | 7   | 109.7855   | 8         | 7   | -59.2079   |
| 9       | 12  | 274.5901   | 9         | 8   | -56.4156   |
| 10      | 15  | 441.2437   | 10        | 13  | 199.7159   |
| 11      | 20  | 903.7136   | 11        | 18  | 119.8105   |
| 12      | 23  | 1176.1450  | 12        | 23  | 345.8480   |
| 13      | 31  | 1532.0614  | 13        | 29  | 964.8702   |
| 14      | 45  | 1202.8246  | 14        | 41  | -117.1634  |
| 15      | 53  | 2173.0411  | 15        | 47  | -261.1983  |
| 16      | 64  | 1528.0132  | 16        | 61  | 700.5449   |
| 17      | 73  | 273.6106   | 17        | 65  | -151.5967  |
| 18      | 82  | -428.0401  | 18        | 76  | 23.2502    |
| 19      | 91  | -353.7843  | 19        | 84  | -302.8406  |
| 20      | 99  | -167.1869  | 20        | 94  | -1650.3627 |
| 21      | 104 | 81.5782    | 21        | 104 | -2202.1479 |
| 22      | 111 | -1760.9726 | 22        | 108 | -2983.5894 |
| 23      | 115 | -1614.1691 | 23        | 115 | -670.7825  |
| 24      | 118 | -2592.3687 | 24        | 116 | -432.7801  |
| 25      | 121 | -3805.0640 | 25        | 122 | -200.0727  |
| 26      | 121 | -3805.0640 | 26        | 124 | -658.6315  |
| 27      | 123 | -5471.9548 |           |     |            |
| 28      | 124 | -6149.0654 |           |     |            |

Rt=22/28=0.79

Supplement: pnas_081086198_7.pdf [file pnas_081086198_7.pdf]

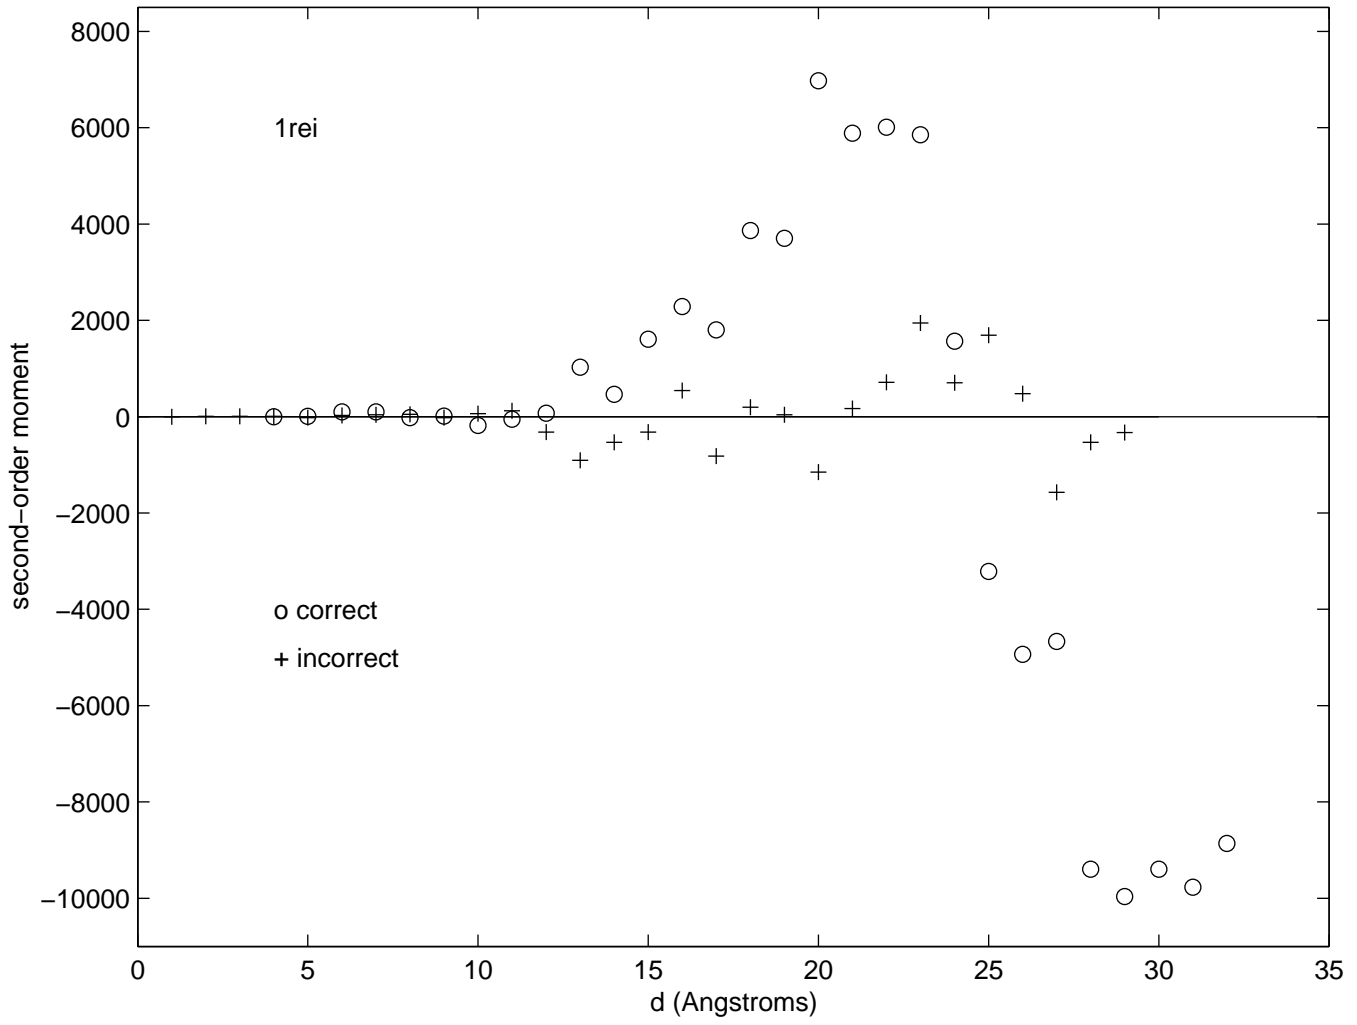

## lrei

| correct |     |            | incorrect |     |           |
|---------|-----|------------|-----------|-----|-----------|
| d       | num | sec-order  | d         | num | sec-order |
| 4       | 0   | 0.0000     | 1         | 0   | 0.000     |
| 5       | 1   | 5.6570     | 2         | 1   | 5.114     |
| 6       | 5   | 98.5051    | 3         | 1   | 5.114     |
| 7       | 6   | 101.6057   | 4         | 1   | 5.114     |
| 8       | 8   | -22.2853   | 5         | 2   | -18.442   |
| 9       | 10  | 13.1022    | 6         | 3   | 23.825    |
| 10      | 12  | -179.7072  | 7         | 7   | 41.727    |
| 11      | 17  | -53.7354   | 8         | 12  | 48.727    |
| 12      | 19  | 70.8862    | 9         | 16  | -21.055   |
| 13      | 27  | 1026.5310  | 10        | 19  | 61.882    |
| 14      | 38  | 464.6187   | 11        | 25  | 121.014   |
| 15      | 49  | 1610.4186  | 12        | 31  | -321.058  |
| 16      | 56  | 2288.9937  | 13        | 39  | -906.143  |
| 17      | 65  | 1803.8865  | 14        | 46  | -532.000  |
| 18      | 79  | 3865.8438  | 15        | 57  | -321.236  |
| 19      | 92  | 3701.2574  | 16        | 68  | 542.574   |
| 20      | 100 | 6975.1630  | 17        | 84  | -818.272  |
| 21      | 114 | 5885.4743  | 18        | 100 | 197.014   |
| 22      | 140 | 6010.9671  | 19        | 113 | 39.383    |
| 23      | 153 | 5853.3016  | 20        | 130 | -1148.885 |
| 24      | 165 | 1566.4299  | 21        | 153 | 167.266   |
| 25      | 174 | -3212.0798 | 22        | 162 | 711.133   |
| 26      | 183 | -4935.8150 | 23        | 175 | 1944.991  |
| 27      | 192 | -4665.0746 | 24        | 190 | 702.522   |
| 28      | 200 | -9394.6894 | 25        | 199 | 1689.689  |
| 29      | 205 | -9966.0550 | 26        | 204 | 476.041   |
| 30      | 208 | -9395.4790 | 27        | 210 | -1570.346 |
| 31      | 210 | -9769.8397 | 28        | 211 | -534.099  |
| 32      | 212 | -8861.0881 | 29        | 212 | -330.054  |

$$Rt=25/32=0.78$$

Supplement: pnas_081086198_8.pdf [file pnas_081086198_8.pdf]
